1 Illuminating the functional rare biosphere of the Greenland Ice Sheet's Dark  
2 Zone

3 Jarishma K. Gokul<sup>1</sup>, Karen A. Cameron<sup>1,2,3</sup>, Tristram D.L. Irvine-Fynn<sup>4</sup>, Joseph M. Cook<sup>1,5</sup>,  
4 Alun Hubbard<sup>4</sup>, Marek Stibal<sup>6</sup>, Matt Hegarty<sup>1</sup>, Luis A.J. Mur<sup>1</sup>, Arwyn Edwards\*<sup>1</sup>

5  
6 Affiliation: <sup>1</sup>Institute of Biological, Rural and Environmental Sciences, Aberystwyth  
7 University, Aberystwyth, UK. <sup>2</sup>Department of Geochemistry, Geological Survey of Denmark  
8 and Greenland, 1350 Copenhagen, Denmark. <sup>3</sup>Center for Permafrost, University of  
9 Copenhagen, 1350 Copenhagen, Denmark. <sup>4</sup>Centre for Glaciology, Department of Geography  
10 and Earth Sciences, Aberystwyth University, Aberystwyth, UK. <sup>5</sup>Department of Geography,  
11 University of Sheffield, Winter Street, Sheffield, UK. <sup>6</sup>Department of Ecology, Faculty of  
12 Science, Charles University, Prague, Czechia.

13 Keywords:

14 \*Corresponding Author: Arwyn Edwards, Institute of Biological, Rural and Environmental  
15 Sciences, Cledwyn Building, Aberystwyth University, Aberystwyth, SY23 3DD, UK.  
16 aye@aber.ac.uk

17  
18 Running title: Bacteria in the Dark Zone of the Greenland Ice Sheet

19

20

21 Abstract (222 words)

22 The Dark Zone of the western Greenland Ice Sheet is the most expansive region of  
23 contiguous bare terrestrial ice in the Northern Hemisphere. Microbial processes within the  
24 Dark Zone play an important role in driving extensive albedo reduction and amplified  
25 melting, yet the composition and function of those consortia have not been fully identified.  
26 Here we present the first results from joint 16S rRNA gene and 16S rRNA (cDNA) analysis  
27 for the comparison of input (snow), storage (cryoconite), and output (supraglacial stream  
28 water) habitats across the Dark Zone over the melt season. Our analysis reveals that all three  
29 Dark Zone communities are characterized by a preponderance of rare taxa exhibiting high  
30 protein synthesis potential (PSP). Furthermore, taxa with high PSP represent highly  
31 connected “bottlenecks” within community structure, consistent with roles as metabolic hubs  
32 within their communities. Finally, the detection of low abundance-high PSP taxa affiliated  
33 with *Methylobacterium* within snow and stream water indicates a potential role for  
34 *Methylobacterium* in the carbon cycle of Greenlandic snowpacks, and importantly, the export  
35 of potentially active methylotrophs to the bed of the Greenland Ice Sheet. By comparing the  
36 dynamics of bulk and potentially active microbial communities in the Dark Zone of the  
37 Greenland Ice Sheet our study provides insight into the mechanisms and impacts of the  
38 microbial colonization of this critical region of our melting planet.

39

40

41

## 42 INTRODUCTION

43 Microbes that colonize snow and ice surfaces live at the critical interface between the  
44 atmosphere and cryosphere (Budyko 1969). Their potential to darken glacier surfaces and  
45 thereby amplify melt (Cook et al 2017, Lutz et al 2016, Nordenskiöld 1870, Ryan et al 2018,  
46 Stibal et al 2017, Takeuchi 2002), has been a long standing question that has recently been  
47 identified by the IPCC (AR5) as requiring urgent attention (IPCC 2014). The “Dark Zone” of  
48 the Greenland Ice Sheet is a conspicuous band of low albedo bare ice that covers some  
49 10,000 km<sup>2</sup> of the western ablating margin of the ice sheet. Surface melt rates of up to eight  
50 metres (water equivalent) per year have been observed here, representing a major component  
51 to the Greenland Ice Sheet’s negative mass-balance and contributor to global sea-level rise  
52 (Ryan et al 2016, Van Tricht et al 2016, Wientjes and Oerlemans 2010, Wientjes et al 2011).  
53 It is a biologically active surface (Cook et al 2012, Hodson et al 2010) where extensive  
54 microbial colonization drives regional surface albedo reduction and enhanced ablation (Ryan  
55 et al 2018, Stibal et al 2017, Tedstone et al 2017). Microbial processes associated with  
56 Greenland’s dark ice surface also contribute to the cycling and hydraulic export of microbial  
57 biomass (Cameron et al 2017, Dubnick et al 2017), organic carbon (Bhatia et al 2013a,  
58 Musilova et al 2017, Stibal et al 2010), nutrients (Bhatia et al 2013b, Hawkings et al 2016) in  
59 significant quantities to downstream englacial, subglacial, and proglacial hydrological  
60 networks and ecosystems which ultimately drain to the coast.

61 Previous studies of microbial diversity within the Dark Zone have focused on supraglacial  
62 communities within granular microbe-mineral aggregates termed cryoconite (Cameron et al  
63 2015, Edwards et al 2014a, Musilova et al 2015, Stibal et al 2015) and glacier algae (Lutz et  
64 al 2018, Yallop et al 2012). These studies employed transects (e.g.(Edwards et al 2014b, Lutz  
65 et al 2018), or used pooled cryoconite material (Musilova et al 2015, Stibal et al 2015),  
66 thereby limiting detailed information regarding temporal bacterial community stability. Few

67 studies have directly addressed the diversity of snowpack bacteria across the region  
68 (Cameron et al 2014). Despite the vast scale of this microbial habitat created by seasonal  
69 snowmelt (Ryan et al 2019), nothing is known of microbial temporal dynamics within this  
70 habitat. Furthermore, although fluviially-exported microbiota from the ice sheet surface may  
71 influence downstream biogeochemical processes such as subglacial methane cycling (Dieser  
72 et al 2014, Lamarche-Gagnon et al 2019), to our knowledge, the microbial diversity and  
73 functional potential of supraglacial meltwater exported from the Dark Zone remains  
74 undocumented.

75 The sequencing of 16S rRNA genes and 16S rRNA (reverse transcribed as cDNA) from co-  
76 extracted DNA and rRNA represents a common strategy within microbial ecology. Its  
77 application for the discrimination of “total” and “active” bacterial communities has been  
78 subject to critique, with limitations in the equivalence of rRNA and “activity” highlighted by  
79 Blazewicz et al (Blazewicz et al). With the caveat that ratios between 16S rRNA (cDNA) and  
80 16S rRNA genes are indicative of protein synthesis potential (PSP; (Blazewicz et al 2013),  
81 rather than unequivocal quantitative evidence of contemporaneous growth, the technique  
82 offers the potential for insights into the responses of taxa to rapidly fluctuating environments.  
83 For example, within alpine proglacial streams which experience considerable diurnal  
84 fluctuation in temperature and discharge, joint 16S rRNA gene and 16S rRNA (cDNA)  
85 sequencing revealed that rare taxa were over-represented in the 16S rRNA (cDNA)  
86 population (Wilhelm et al 2014). Within the austere and isolated environs of the Dark Zone in  
87 summer, solar radiation, air temperature, melt intensity, and stream discharge all fluctuate  
88 with high periodicity, typically diurnally, and hence well within the typical doubling times of  
89 supraglacial microbes (Anesio et al 2010, Williamson et al 2018). How the bacterial  
90 communities of the Dark Zone respond to these fluctuations remains unknown, and the  
91 potential for these rare taxa to disproportionately influence community structure is unknown.

92 In this study, we address these questions by presenting an integrated study of community  
93 structure, connectivity, and its functional potential within three principal bacterial habitats  
94 within the Dark Zone: snow (input), cryoconite hole (storage) and runoff (output). We  
95 evaluate the temporal dynamics of bacterial communities from these three habitats using  
96 analysis of both 16S rRNA gene and 16S rRNA (cDNA). This was performed by sampling at  
97 weekly intervals, in June and July 2014, to incorporate the transition from early season melt  
98 onset to snow-free exposed ice surface.

99

## 100 MATERIALS AND METHODS

### 101 Methods summary

102 Sampling took place on the western ablating margin of the Greenland Ice sheet, within the  
103 Dark Zone and adjacent to the Kangerlussuaq (K-) transect S6 automatic weather station  
104 (AWS), at 67°05'N, 49°23'W; 1020 m asl (FIGURE 1). Cryoconite, snow and water from  
105 supraglacial meltwater streams was collected in triplicate, on seven sampling occasions, at  
106 weekly intervals between June 19 and July 31 2014. Independent sites, within a 25m<sup>2</sup> area  
107 were used for each sampling occasion. A total of 62 samples were collected and chemically  
108 preserved using Soil Lifeguard (MO BIO Laboratories). Samples were then frozen as soon as  
109 possible. Upon return to the home laboratory, community DNA and RNA was co-extracted  
110 from snow and meltwater samples previously concentrated on 0.22 µm Sterivex GP  
111 polyethersulfone filters (Millipore, MA, USA) using a modified PowerWater® Sterivex™  
112 DNA Kit and from cryoconite using a PowerBiofilm™ RNA Isolation Kit (MO BIO  
113 Laboratories) prior to 16S rRNA gene and 16S rRNA (cDNA) quantitative PCR (qPCR) and  
114 V3-V4 region MiSeq (Illumina) sequencing. All sequence data are available on EBI-SRA  
115 under the study accession number PRJNA318626. The methods employed for sample

116 archival, nucleic acid extraction, qPCR, sequencing and data processing are detailed in full as  
117 **supplementary methods.**

118

## 119 RESULTS

### 120 Bacterial 16S rRNA gene and 16S rRNA (cDNA) quantification

121 Quantitative PCR was used to analyse the amplifiable copy number of 16S rRNA genes and  
122 16S rRNA in DNA and cDNA samples (**Figure 2**). The abundance of the cryoconite bacterial  
123 community appeared highly consistent across the sampling period (**Figure 2A**) with weekly  
124 averages of  $2.4 - 4.5 \times 10^5$  amplifiable copies of the 16S rRNA gene per gram dry weight of  
125 cryoconite. The amplifiable copy number of the 16S rRNA pool fluctuated, ranging between  
126 a weekly average of  $2.3 \times 10^7$  (week 4) and  $1.6 \times 10^9$  (week 2) per gram dry weight of  
127 cryoconite. The ratio between 16S rRNA gene and 16S rRNA (cDNA) amplifiable copy  
128 number is interpreted as a marker of the overall bacterial PSP. Average cryoconite bacterial  
129 PSP showed high (1:88, week 4) to extremely high ratios (1:5000, week 2) throughout the  
130 study period. This is indicative of a high level of potential activity relative to biomass within  
131 the cryoconite bacterial communities sampled.

132 For the snow bacterial community (**Figure 2B**), weekly average amplifiable copies of the 16S  
133 rRNA gene increased from  $3.0 \times 10^4$  copies per litre (water equivalent) in the first week of  
134 the study to  $7.6 \times 10^8$  copies per litre (water equivalent) in the final week. Weekly average  
135 amplifiable copies of 16S rRNA (cDNA) also increased from  $4.5 \times 10^4$  copies per litre (water  
136 equivalent) in the first week of the study to  $2.8 \times 10^7$  copies per litre (water equivalent) in the  
137 penultimate week. Weekly average bacterial PSP values for snow were consistently below  
138 equivalence, with exception of the first week (1:1.5 ratio). When viewed in the context of the  
139 rapid seasonal wastage of the snowpack in the study period, this likely represents the melt

140 scavenging of bacterial cells incurring physical accumulation of quiescent biomass within the  
141 residual snow pack.

142 Stream water bacterial communities (Figure 2C) exhibited 16S rRNA gene amplifiable copy  
143 numbers several orders of magnitude lower in week 1 ( $2.8 \times 10^4$  16S rRNA gene copies per  
144 litre) compared to the remainder of the study period ( $3.1 - 3.6 \times 10^6$  16S rRNA gene copies  
145 per litre). rRNA copy numbers were at least an order of magnitude higher ( $5.5 \times 10^5$  to  $3.9 \times$   
146  $10^5$  16S rRNA copies per litre) compared to the first week. Stream water bacterial PSP values  
147 varied between 0.3 and 2.8 during the study period. In summary, it is likely the stream water  
148 bacterial community was an admixture of quiescent and active taxa in transit from different  
149 sources (e.g. snowmelt, ice melt, cryoconite and other biofilms) from the ice sheet surface.

#### 150 Community structure

151 The total number of reads obtained after sequence processing was 2,673,556 with a  
152 maximum of 130,001 reads (GrIScDNAcryo6.3), a minimum of 5 (GrISstream3.1) and a  
153 mean of 21,561 reads. Sequences were filtered and rarefied to 943 sequences per sample,  
154 resulting in the exclusion of 1 cryoconite DNA sample, 2 stream DNA samples, 3 cryoconite  
155 cDNA samples, 3 snow cDNA samples and 6 stream cDNA samples from downstream  
156 analysis. Sequences were clustered into 566 operational taxonomic units (OTUs) at 97%  
157 sequence similarity. 13.59 % of 16S rRNA gene OTUs and 14.40 % 16S rRNA (cDNA)  
158 OTUs were common to all three habitats.

159 Over 99 % of the sequences in the dataset from cryoconite hole, snow and stream water  
160 habitats were successfully assigned to the Greengenes taxonomy using UCLUST. Non-  
161 metric multidimensional scaling of OTUs clearly ordinated both 16S rRNA gene and 16S  
162 rRNA (cDNA) profiles of the bacterial communities by habitat type (Figure 3A). These  
163 trends were confirmed by PERMANOVA of fourth-root transforms of Bray-Curtis distances

164 of OTU relative abundance matrices. Highly significant differences were found between all  
165 habitat types (Pseudo $F$  = 13.8,  $p$  = 0.0001, [Supplementary Table 2](#)). Furthermore, highly  
166 significant differences are apparent between OTU composition of 16S rRNA gene and 16S  
167 rRNA (cDNA) profiles for each of the habitat types (Pseudo $F$  values = 5.3 - 22.5,  $p$  =  
168 0.0001). The snow and stream communities revealed in 16S rRNA gene profiles (Pseudo $F$  =  
169 2.6,  $p$  = 0.0001 and Pseudo $F$  = 2.4,  $p$  = 0.0001 respectively) were temporally dynamic at  
170 weekly sampling resolution, with highly significant differences. The 16S rRNA (cDNA)  
171 profiles of cryoconite and snow were significant and highly significantly different by week  
172 (Pseudo $F$  = 1.7,  $p$  = 0.02 and Pseudo $F$  = 3.0,  $p$  = 0.0004 respectively), while stream profiles  
173 are temporally stable. In contrast, while cryoconite exhibited highly significantly different  
174 16S rRNA gene and 16S rRNA (cDNA) profiles, the 16S rRNA gene profiles were  
175 temporally stable. All PERMANOVA results are detailed in [Supplementary Table 2](#).

#### 176 Trends in taxonomic composition

177 Pronounced differences between 16S rRNA gene and 16S rRNA (cDNA) taxonomic profiles  
178 are apparent for each of the habitats ([Figure 3B](#)). Whereas 16S rRNA gene data reveal  
179 Actinobacteria, Bacteroidetes and Alphaproteobacteria are the major groups in cryoconite  
180 with a modest representation from Cyanobacteria, from the 16S rRNA (cDNA) data  
181 Cyanobacteria are the strikingly dominant group throughout the study period ([Figure 3](#)).  
182 Similarly, while the 16S rRNA gene profiles of snow reveal a transition between  
183 Alphaproteobacteria dominated community to a Bacteroidetes dominated community during  
184 the study period, Alphaproteobacteria remains the dominant group within the 16S rRNA  
185 (cDNA) profile, with an increase in Acidobacteria in the final two weeks of the study.  
186 Meanwhile, the discordance between 16S rRNA gene and 16S rRNA (cDNA) profiles are  
187 further mirrored in supraglacial streamwater, where Bacteroidetes and Betaproteobacteria  
188 were found to be in equitable dominance in the 16S rRNA gene dataset, and



189 Alphaproteobacteria strongly dominated the 16S rRNA (cDNA) profiles. In summary, the  
190 trends in taxonomic composition observed are consistent with discrete bulk and potentially  
191 active communities, with phototrophic cyanobacteria active relative to biomass in cryoconite,  
192 and the Alphaproteobacteria notably active in snow and stream water.

193 We considered the potential impact of contamination on the taxa detected in our samples.  
194 Negative controls comprising blank DNA extractions were sequenced in parallel with field  
195 samples. The controls returned a small number of reads assigned to a total of 10 taxa, and  
196 were therefore excluded from the analysis of rarefied data. The most abundant sequence in  
197 the control samples was a *Salinibacter* sp. represented by a total of 16 reads ([Supplementary](#)  
198 [Table 3](#)). In contrast, the thirty most represented OTUs from 16S rRNA gene and 16S rRNA  
199 (cDNA) data from each habitat match taxa detected orthogonally from the natural  
200 environment, with glacial and other cryospheric habitats strongly represented ([Supplementary](#)  
201 [Table 4](#)). The influence of contamination on the present study is therefore considered  
202 minimal.

### 203 16S rRNA gene sequencing

#### 204 Trends in potential activity and relative abundance

205 The strikingly distinctive 16S rRNA gene and 16S rRNA (cDNA) profiles were further  
206 investigated to reveal taxonomic groups over- and under-represented in 16S rRNA (cDNA)  
207 compared to 16S rRNA genes ([Figure 4](#)). All detected phyla/proteobacterial classes with the  
208 exception of *Cyanobacteria* were under-represented in 16S rRNA (cDNA) for cryoconite  
209 ([Figure 4A](#)), whereas Alphaproteobacteria, Acidobacteria, Firmicutes and WPS2 were over-  
210 represented in snow ([Figure 4B](#)) and Alphaproteobacteria, Verrucomicrobia, OD1 and  
211 Firmicutes were over-represented in stream water communities ([Figure 4C](#)).

212 OTUs present at  $\leq 1\%$  relative abundance constituted a large percentage of the bulk  
213 community within rank abundance curves (Fig 4A-C). Applying the  $\leq 0.1\%$  of relative  
214 threshold commonly used to delimit the “rare” biosphere (Pedrós-Alió 2012), 57 % of  
215 cryoconite OTUs, 62 % of snow OTUs and 63 % of stream OTUs would be considered “rare”  
216 taxa within the Dark Zone bulk community. Rare taxa would need to exhibit a minimum  
217 mean relative abundance of  $\geq 0.005\%$  to be represented in datasets of this size. Rank  
218 abundance curves show that 48 % of rare cryoconite-habitat OTUs, 40.45 % of rare snow-  
219 habitat OTUs and 42.36 % of rare stream-habitat OTUs exhibit positive protein synthesis  
220 potentials (PSP, the ratio between 16S rRNA gene and 16S rRNA [cDNA] relative  
221 abundance) over the course of 7 weeks. In each community (Figure 4 A-C), taxon PSP is  
222 negatively correlated with mean taxon relative abundance (Spearman correlation; cryoconite:  
223  $r = -0.63, p < 0.0001$ , snow:  $r = -0.65, p < 0.0001$ , stream  $r = -0.55, p < 0.0001$ ). The trends  
224 exhibited are congruent with the notion that certain rare taxa in surface habitats in  
225 Greenland’s Dark Zone exhibit disproportionately high protein synthesis potential.

#### 226 Dynamics of high-PSP OTUs.

227 To establish the contribution of high PSP OTUs over time, OTUs exhibiting weekly PSP  
228 averages  $\geq 1$  in the dataset were plotted over time and compared to their relative abundance  
229 within the 16S rRNA gene dataset (Figure 5). For the cryoconite community (Figure 5A), 30  
230 of 34 OTUs meeting this criterion were members of Cyanobacteria, with taxa assigned to  
231 *Leptolyngbya* representing the majority, including both the highest PSP OTU (*Leptolyngbya*-  
232 76) and highest relative abundance OTU (*Leptolyngbya*-3). In the snow community,  
233 Alphaproteobacteria represented 22 of 30 taxa with weekly average PSP  $\geq 1$  (Figure 5A).  
234 Notably, *Methylobacterium*-1 is highly abundant in the first week of the study with a  
235 corresponding mean PSP of 6.8. However, for the next three weeks, while *Methylobacterium*-  
236 1 shows much lower relative abundance, its PSP is strikingly high (ranging 185- to 304-fold).

237 *Methylobacterium*-1 is not detected in snow community after week four. In all, six OTUs  
238 assigned to *Methylobacterium* are prominent in the high PSP taxa of the snow community.  
239 This is echoed within the stream community. Here, *Methylobacterium*-1 again shows high  
240 PSP values, in the range of 49 - 111 between weeks two and seven, however its relative  
241 abundance is low, amounting to <2 % of the community overall. Four OTUs assigned to  
242 *Methylobacterium* are present among 28 Alphaproteobacteria OTUs, with  
243 Sphingomonadaceae taxa well represented. In all, 45 OTUs show weekly average PSP  $\geq 1$ .  
244 Seven *Cyanobacteria* affiliated with *Leptolyngbya* (including the *Leptolyngbya*-3 and  
245 *Leptolyngbya*-76 prominent in the cryoconite community) are present with four members of  
246 Acidobacteria. The prominence of high PSP taxa in stream water from lineages conspicuous  
247 within the snowpack and cryoconite community is consistent with the runoff export of  
248 potentially active taxa from surface habitats of the Greenland Ice Sheet's Dark Zone.

#### 249 Keystone species-high PSP rare OTU relationship

250 Taxa that exert a disproportionate influence on the structure of the microbial community,  
251 despite low or moderate abundances can be termed keystone species (Power and Mills 1995).  
252 High betweenness centrality, measured as the shortest number of paths between any two  
253 other OTUs passing through that OTU, is interpreted as a hallmark of a keystone species  
254 (Peura et al 2015). Co-occurrence analysis identified sixteen OTUs with betweenness-  
255 centrality scores (in the range 7.16 to 0.2; **Table 1**). All have cumulative positive PSP ratios  
256 in at least one habitat over the course of the study, and with the exception of one  
257 *Comamonadaceae* OTU with a cumulative mean PSP of 1.98, the remainder show high to  
258 very high maxima in their cumulative PSP ratios, in the range 10.5 - 405.8. Again,  
259 *Methylobacterium*-1 is represented, with the highest (snow: 405.8) and second highest  
260 (stream: 368.2) cumulative mean PSPs. Two other OTUs assigned to *Methylobacterium* show  
261 the next highest cumulative mean PSPs in stream and snow. For cryoconite, *Leptolyngbya*

262 assigned OTUs are prevalent as keystone taxa with high cumulative mean PSP. Of the four  
263 *Leptolyngbya* assigned OTUs, *Leptolyngbya-76*, *Leptolyngbya-106* and *Leptolyngbya-3* show  
264 the highest cryoconite PSPs, but have modest betweenness scores. The considerable overlap  
265 between putative keystone species and high PSP taxa, including those present at low  
266 abundance, presents the possibility that taxa with high levels of protein synthesis potential are  
267 influential in the dynamics of their communities irrespective of their relative abundance.  
268 Thirteen of the sixteen OTUs are most closely related to taxa distributed across the global  
269 cryosphere (Table 1).

270

## 271 DISCUSSION

### 272 Snow bacterial communities

273 Our results provide the first insights into the dynamics of bulk and potentially active  
274 communities of decaying snowpacks in the ablating zone of the ice sheet during the transition  
275 to bare ice. At the start of the study bacterial PSP is positive (Figure 2), however this rapidly  
276 declines for the remainder of the sampling period. In contrast, 16S rRNA gene copy numbers  
277 increase by 3-4 orders of magnitude for the remainder of the sampling period. This is likely  
278 due to the accumulation of biomass within decaying snow due to physical processes rather  
279 than biological growth (Björkman et al 2014). Melting snowpacks are physically and  
280 chemically dynamic environments, and it appears only a few lineages are able to maintain  
281 their populations in supraglacial snow as it decomposes to slush (Hell et al 2013), with other  
282 taxa being washed out. Indeed, 16S rRNA gene and 16S rRNA (cDNA) OTU profiles were  
283 highly significantly different over time (Supplementary Table 2).

284 Here, snowpack 16S rRNA gene copies greatly exceed 16S rRNA copy numbers, indicating  
285 the bulk community is likely to be exported as cells with low PSP. For example, the relative

286 under-representation of Bacteroidetes in 16S rRNA (cDNA) raises the possibility that  
287 cellulose-degrading taxa become quiescent when dissociated from sources of complex  
288 organic carbon, for example supraglacial phototrophs (Smith et al 2016). It is therefore likely  
289 that the abundant groups of bacteria in decaying snow serve as sources of cellular carbon and  
290 nutrients rather than viable taxa capable of inoculating downstream habitats. The rare, high  
291 PSP *Methylobacterium* sp. OTUs detected represent an exception which will be discussed  
292 below.

293 Although most of the Greenland Ice Sheet is perennially covered with snow, few studies have  
294 examined the snowpack microbiology of the Greenland Ice Sheet (Cameron et al 2014).  
295 Moreover, the highly isolated setting of field sites coupled with the potential for  
296 contamination of low-biomass samples make such studies challenging. By establishing a field  
297 camp for the duration of the study, careful handling of samples and the sequencing of  
298 negative controls we were able to mitigate these limitations. Negative controls returned very  
299 small numbers of reads (Supplementary Table 3). Prominent groups of bacteria in our study  
300 were not represented in negative controls with the exception of seven reads matching  
301 *Phormidesmis priestleyi*, likely indicating post amplification carry-over of a dominant  
302 amplicon type at negligible levels compared to its abundance in field samples.

303

#### 304 Cryoconite bacterial communities

305 Lower copy numbers of 16S rRNA genes were amplified by qPCR compared to previous  
306 studies employing 16S rRNA gene qPCR based upon larger, wet-weight samples (Stibal et al  
307 2015). However, the overall trends are consistent between both studies. Considering potential  
308 limitations in extraction efficiency and biases inherent in all PCR based analyses, we avoid

309 treatment of qPCR data as absolute quantities of 16S rRNA genes or 16S rRNA in our  
310 samples and limit our comparison to trends within the dataset.

311 Exceptionally high ratios of 16S rRNA to rRNA genes were measured in cryoconite (Figure  
312 2). Combined with amplicon sequencing data revealing cyanobacteria were overwhelmingly  
313 dominant within the 16S rRNA (cDNA) population (Figure 3, Figure 5) we interpret this as  
314 evidence of the high PSP of cyanobacteria within the cryoconite granules. Since filamentous  
315 cyanobacterial phototrophs such as *Phormidesmis priestleyi* are well known as ecosystem  
316 engineers (Cook et al 2015, Edwards et al 2014a) of cryoconite granules through their  
317 primary production and granule-building (Langford et al 2010), this is highly plausible.

318 Other work within the same field season at the same site lends support to our findings.  
319 Firstly, *Phormidesmis priestleyi* was isolated in culture and genome sequenced (Christmas et  
320 al 2016) and secondly perturbation of cryoconite hole structure and microbial activity  
321 revealed *Phormidesmis* sp. employ sensitive photoadaptive mechanisms to optimize carbon  
322 sequestration in cryoconite holes (Cook et al 2016). Correspondingly, the prominence of  
323 OTUs extremely closely related to *Phormidesmis priestleyi* (Table 1), albeit assigned to  
324 *Leptolyngbya* (-3 and -76) within the high PSP (Figure 5) and keystone taxa (Table 1) of  
325 cryoconite granules extends insights from previous studies by linking specific *Phormidesmis*  
326 lineages with metabolic activities within Arctic cryoconite.

327 Importantly, previous analysis of 16S rRNA genes has resolved a single *Phormidesmis* OTU  
328 is cosmopolitan (Segawa et al 2017) within diverse Arctic glacial settings (Cook et al 2016,  
329 Edwards et al 2011, Gokul et al 2016, Uetake et al 2016). However, in our study, while one  
330 *Phormidesmis* OTU (*Leptolyngbya*-3) is likely to play a structural role, two other lineages  
331 (*Leptolyngbya*-76, *Leptolyngbya*-106) have PSP in gross excess to their biomass, indicated by  
332 contrasting trends in PSP and 16S rRNA gene relative abundance (Figure 5). The bulk

333 bacterial community structure of cryoconite granules was stable over the course of the study,  
334 consistent with prior studies (Musilova et al 2015). However the *Phormidesmis* dominated  
335 16S rRNA (cDNA) pool of the bacterial community of cryoconite changed over time, with  
336 highly significant changes revealed by PERMANOVA (Supplementary Table 2). Therefore,  
337 the potential for metabolic and structural niche differentiation among cryoconite  
338 *Phormidesmis* merits further investigation.

### 339 Supraglacial stream water bacterial communities

340 Meltwater runoff from the Greenland Ice Sheet surface is thought to be a major contributor to  
341 sea level rise (Smith et al 2017). Although this meltwater is an important source of organic  
342 carbon and nutrients to downstream ecosystems (Bhatia et al 2013a, Bhatia et al 2013b,  
343 Hawkings et al 2016, Musilova et al 2017) and the microbial fluxes in outflows of the  
344 Greenland Ice Sheet have been studied (Cameron et al 2017, Dubnick et al 2017), the absence  
345 of data on microbial export from the Greenland Ice Sheet surface represents a critical lacuna  
346 in our understanding of the Greenland Ice Sheet ecosystem. Within this study, this is  
347 addressed by 16S rRNA gene and 16S rRNA (cDNA) qPCR and sequence data which reveal  
348 the export of microbial groups prevalent in snow and cryoconite in meltwater from three  
349 ephemeral supraglacial streams.

350 Quantitative PCR reveals the stream water bacterial community in the first week of the study  
351 contains approximately equal copy numbers of bacterial 16S rRNA genes and 16S rRNA  
352 (cDNA) resulting in a bacterial PSP of 0.97. By the second week, both genes and rRNA have  
353 increased their average copy number by two orders of magnitude. Highly significant  
354 differences were observed in the community structure of bulk, but not active stream bacterial  
355 communities over time (Supplementary Table 2). Only one profile each of the bulk and active  
356 communities could be analysed from week one, but both were strongly dominated by

357 Alphaproteobacteria. Subsequent weeks are marked by a more diverse bulk bacterial  
358 community, although *Alphaproteobacteria* were highly dominant in the potentially active  
359 bacterial community throughout. Sphingomonadaceae, Acetobacteraceae, and Rickettsiaceae  
360 are prevalent in the high PSP *Alphaproteobacteria* detected in stream water, but the highest  
361 PSP taxon is *Methylobacterium-1*, which is also a high-betweenness putative keystone  
362 species.

363 The presence of cyanobacterial taxa associated with cryoconite, including *Leptolyngbya-3*  
364 and *Leptolyngbya-76* in stream water indicates the export of potentially active primary  
365 producers. It is likely these cyanobacteria originate from biomass sheared from cryoconite  
366 granules either present in cryoconite holes, as distributed cryoconite on the ice surface or in  
367 stream cryoconite (so-called “hydroconite”; (Hodson et al 2007). It is likely these  
368 phototrophs represent sources of highly bioavailable dissolved organic carbon exported from  
369 the glacier surface (Musilova et al 2017).

#### 370 High Protein Synthesis Potential Rare Taxa in the Dark Zone of Greenland

371 A consistent pattern for all three habitats sampled was that bulk and potentially active  
372 communities of snow, cryoconite and stream habitats were highly significantly different  
373 (Supplementary Table 2, Figure 3). Furthermore, a small subset of taxa were consistently  
374 over-represented in 16S rRNA (cDNA) compared to their corresponding 16S rRNA gene  
375 relative abundances, most notably the Cyanobacteria in cryoconite and Alphaproteobacteria  
376 in snow and stream habitats. Other taxa were typically under-represented. The majority of  
377 taxa present within the surface of the Dark Zone appear to exhibit low protein synthesis  
378 potential. This may be due to resource limitation, dormancy or the detection of DNA  
379 associated with dead cells (Blazewicz et al 2013). Each of the above scenarios has important  
380 ecological implications. Firstly in terms of maintaining a pool of organisms which may



381 respond to stimuli such as allochthonous resources, and secondly, the maintenance of a  
382 “seedbank” of conditionally viable cells (Lennon and Jones 2011), or at the very least, the  
383 contribution of carbon and nutrients in otherwise oligotrophic environments in the form of  
384 necromass. Differentiation between these scenarios is beyond the scope of 16S rRNA gene  
385 analyses (Blazewicz et al 2013) and the potential for “active” taxa to be mis-classified as  
386 “dormant” by 16S rRNA (cDNA) / 16S rRNA gene comparison has been described in  
387 computational simulations (Steven et al 2017).

388 Nevertheless, a further notable trend which was consistent across all three habitats was a  
389 marked prominence of rare taxa among those with high PSP. Such patterns have been  
390 observed in other, comparable contexts, for example within proglacial streams in the  
391 European Alps (Wilhelm et al 2014). In those systems, such trends have been considered  
392 hallmarks of habitats exhibiting severe fluctuations in their environmental conditions such as  
393 temperature, discharge or solar radiation at timescales briefer than the doubling time of the  
394 resident community (Lennon and Jones 2011, Wilhelm et al 2014). Here, no overall trends  
395 were apparent in terms of the influence of meteorological parameters from week to week,  
396 however when monitored continuously (Figure 1) profound oscillations in temperature,  
397 incoming short- and long- wave radiation, air temperature, energy flux and melt intensity are  
398 apparent at diurnal to sub-weekly periodicity. Considering the sluggish growth of organisms  
399 at temperatures at or near freezing (Anesio et al 2010), it is likely that such oscillations create  
400 rapidly changing niche spaces at timescales shorter than community doubling times. It is  
401 therefore likely that organisms exhibit high PSP relative to their biomass when they are able  
402 to maintain activity but not achieve net population growth in the face of unstable fitness.

403 Consequently, through their metabolic activities, high PSP rare taxa may be  
404 disproportionately influential within their communities, fitting the definition of keystone taxa.  
405 This is coherent with the corresponding prevalence of high PSP rare taxa among putative

406 keystone taxa identified by betweenness (Table 1). Gokul et al (Gokul et al) previously  
407 identified supraglacial keystone taxa in the cryoconite communities of a High Arctic ice cap,  
408 and the present study extends the case that specific rare taxa exert disproportionate influence  
409 on the bacterial communities of glacier surfaces through maintaining high levels of metabolic  
410 potential. Table 1 reports these taxa typically possess very close relatives (either as  
411 environmental sequences or named isolates) in a diverse range of habitats within the global  
412 cryosphere, with two implications. Firstly, this lends pragmatic support to their likely  
413 authenticity within the communities of the Greenland Ice Sheet Dark Zone, but secondly, the  
414 inference is that adaptations resulting in disproportionately high PSP may be common among  
415 cosmopolitan species in the polar and alpine regions.

#### 416 Implications for biogeochemical cycling

417 The prominence of OTUs assigned to *Methylobacterium* in the high PSP taxa of snow and  
418 stream water communities is very apparent. In particular, the exceptionally high PSP shown  
419 by the *Methylobacterium*-1 OTU is striking for both habitat types, with other related OTUs  
420 (*Methylobacterium*-6342 and *Methylobacterium*-1508) showing very high PSP.  
421 *Methylobacterium*-1 is well represented within the snowpack 16S rRNA gene profiles of  
422 week 1, but then shows disproportionately high PSP in following weeks before its loss from  
423 the snowpack community by the fifth week. This would suggest continued protein synthesis  
424 potential is maintained for some time in spite of its rapidly diminished population size within  
425 the snowpack.

426 Combined, this pattern of high PSP taxa affiliated to the genus *Methylobacterium* merits  
427 further consideration. *Methylobacterium* are well known facultative methylotrophs  
428 (Chistoserdova et al 2003, Chistoserdova 2011), raising the prospect of methyl metabolism as  
429 a hitherto unappreciated metabolic strategy on the Greenland Ice Sheet. Redeker et al

430 (Redeker et al 2017) provided direct evidence of trace gas metabolism in polar snowpacks  
431 through the cycling of methyl halides and dimethyl sulphides. Although Redeker et al (2017)  
432 did not explore the diversity of microbes associated with methyl cycling, it is possible that  
433 *Methylobacterium* in the decaying snowpacks of the Dark Zone are involved in cycling of  
434 climate-relevant trace gases.

435 The relevance of disproportionately high PSP *Methylobacterium* to biogeochemical cycling  
436 in the Dark Zone is further amplified when their status as the dominant 16S rRNA (cDNA)  
437 taxon in meltwater exports is considered. Supraglacial meltwater from the Dark Zone is  
438 typically routed via surface streams into moulins to the bed of the Greenland Ice Sheet, an  
439 environment conducive for methane cycling (Yang and Smith 2016). In catchments fed by  
440 meltwater from the Dark Zone, variable rates of methanogenesis and methane oxidation have  
441 been observed, with potential impacts for the global methane cycle (Dieser et al 2014,  
442 Lamarche-Gagnon et al 2019). The discharge of highly oxygenated supraglacial meltwater  
443 into the subglacial environment is strongly associated with the cessation of methanogenesis  
444 and consumption of methane via aerobic oxidation (Dieser et al 2014). The export of high  
445 PSP *Methylobacterium* from the Dark Zone surface in this meltwater, as detected here, raises  
446 the prospect that surface-derived taxa inoculating the bed of the Greenland Ice Sheet play a  
447 role within a subglacial consortium nourished by the oxidation of methane. Further  
448 investigations focused on the fate of supraglacial microbiota transferred to the subglacial  
449 ecosystem could reveal whether this process is sufficient to mitigate the subglacial synthesis  
450 of this potent greenhouse gas.

#### 451 Conclusions

452 In summary, 16S rRNA gene and rRNA (cDNA) quantification and sequencing of snow,  
453 cryoconite and stream water bacterial communities from the Dark Zone of the Greenland Ice

454 Sheet was conducted at weekly intervals during the melt season of 2014. Recently, attention  
455 has been focused on the albedo-reducing properties of microbial consortia within the Dark  
456 Zone (Williamson et al 2019) highlighting the importance of microbial interactions in the  
457 future of the Greenland Ice Sheet. Our study addresses the related question of microbial  
458 community dynamics, and reveals that rare taxa appear to be disproportionately active.  
459 Notably, these taxa appear central to the structure of their communities and may play under-  
460 appreciated roles within the carbon cycle of the Greenland Ice Sheet. The presence of high-  
461 PSP rare taxa within *Methylobacterium* in melting snow and stream-water raises the prospect  
462 of supraglacial methyl compound cycling and export to the subglacial ecosystem. Our study  
463 represents a targeted locus amplicon sequencing approach, which in future could be  
464 complemented with genome-resolved metagenomics and direct process measurements of  
465 carbon cycling and export in both Dark Zone surface and connected downstream habitats.  
466 This would further elucidate the connections between these communities, climate change and  
467 impacts on downstream riverine and marine ecosystems from the most expansive supraglacial  
468 bare ice habitat in the Northern Hemisphere.

469

#### 470 ACKNOWLEDGEMENTS

471 This manuscript is dedicated to the memory of Kathi Hell (1985-2019) whose earlier work  
472 with us on dynamic Arctic snow microbiomes helped inspire the study described herein.  
473 Fieldwork and laboratory analyses were supported by Royal Society grant RG130314 to AE  
474 and TI-F while JKG was supported by a South African National Research Foundation  
475 Fellowship. Sequencing was performed using BBSRC funded facilities for the analyses  
476 described herein. KAC acknowledges funding from the European Union's Horizon 2020  
477 research and innovation programme under the Marie Skłodowska-Curie grant agreement No

478 663830. Financial support was also provided to KAC by the Welsh Government and Higher  
479 Education Funding Council for Wales through the Sêr Cymru National Research Network for  
480 Low Carbon, Energy and Environment. AE is grateful for Leverhulme Trust Research  
481 Fellowship RF-2017-652\2 and NERC NE/S1001034/1 which eased completion of the work.

482

483 **The authors declare no conflict of interest**

#### 484 **LIST OF FIGURES**

485 **FIGURE 1:** Overview of the study location and physical conditions. (A) The Dark Zone of  
486 the Greenland Ice Sheet. RGB composite image of the Kangerlussuaq region of the  
487 Greenland Ice Sheet generated from the European Space Agency Sentinel 2 reflectance  
488 product (atmospheric correction and reprojection of Level 1C tile downloaded from  
489 earthexplorer.usgs.gov using Sen2Cor, then bands 2, 3 and 4 merged and scaled using  
490 GDAL) showing the study site marked with a star, 38 km inland of the Greenland Ice Sheet  
491 margin. (B) Shortwave Incident Radiation (SWIR), Long Wave Radiation (LWR), air  
492 temperature, humidity, wind speed and direction, turbulent radiation (Turb Rad) and melt rate  
493 monitored at automatic weather station site S6. Meteorological data courtesy of CJPP Smeets  
494 and MR van den Broeke, Utrecht University.

495 **FIGURE 2:** Quantitative PCR data on 16S rRNA gene (grey bars) and 16S rRNA (cDNA;  
496 open bars) amplifiable copy number and bacterial protein synthesis potential (diamonds) for  
497 (A) cryoconite, (B) snow, and (C) meltwater based upon analysis of triplicate weekly samples  
498 for each habitat for 7 weeks after the 19<sup>th</sup> of June 2014. Note the different scales for each sub-  
499 panel.

500 **FIGURE 3:** Overview of amplicon sequencing data. (A) Non-metric multi-dimensional  
501 scaling (nMDS) of fourth-root transformed Bray Curtis distances in OTU relative abundances

502 for 16S rRNA genes and 16S rRNA ordinated by habitat. (B) Community composition based  
503 on phylum (or proteobacterial class) relative abundance for 16S rRNA genes and 16S rRNA  
504 ordinated by habitat. Blank bars indicate samples excluded upon rarefaction.

505 **FIGURE 4:** Relationships between 16S rRNA gene and 16S rRNA (cDNA) data for (A)  
506 cryoconite, (B) snow, and (C) streams during the study period. For each habitat, the  
507 correlation between phylum (and proteobacterial class) relative abundances between 16S  
508 rRNA gene and 16S rRNA (cDNA) data is shown. The diagonal line is used to indicate 1:1  
509 equivalence. Rank abundance curves denote the OTU level distribution of taxa. The black  
510 line indicates the rank abundance curve of 16S rRNA gene OTUs against their relative  
511 abundance (left vertical axis). Data points represent individual OTUs, coloured by their  
512 parent phylum or proteobacterial class. Vertical lines indicate the position of taxa below 1%  
513 (red) and 0.1% (purple) relative abundance (RA).

514 **FIGURE 5:** Temporal dynamics of OTUs with average weekly Protein Synthesis Potential  
515  $\geq 1$  for (A) cryoconite, (B) snow, and (C) streams during the study period. The left hand plots  
516 show the relative abundance of each taxon by week while the right hand plots show the  
517 protein synthesis potential. Each OTU is named according to the lowest grade Greengenes  
518 taxon assigned and its denovo-OTU reference.

(A)

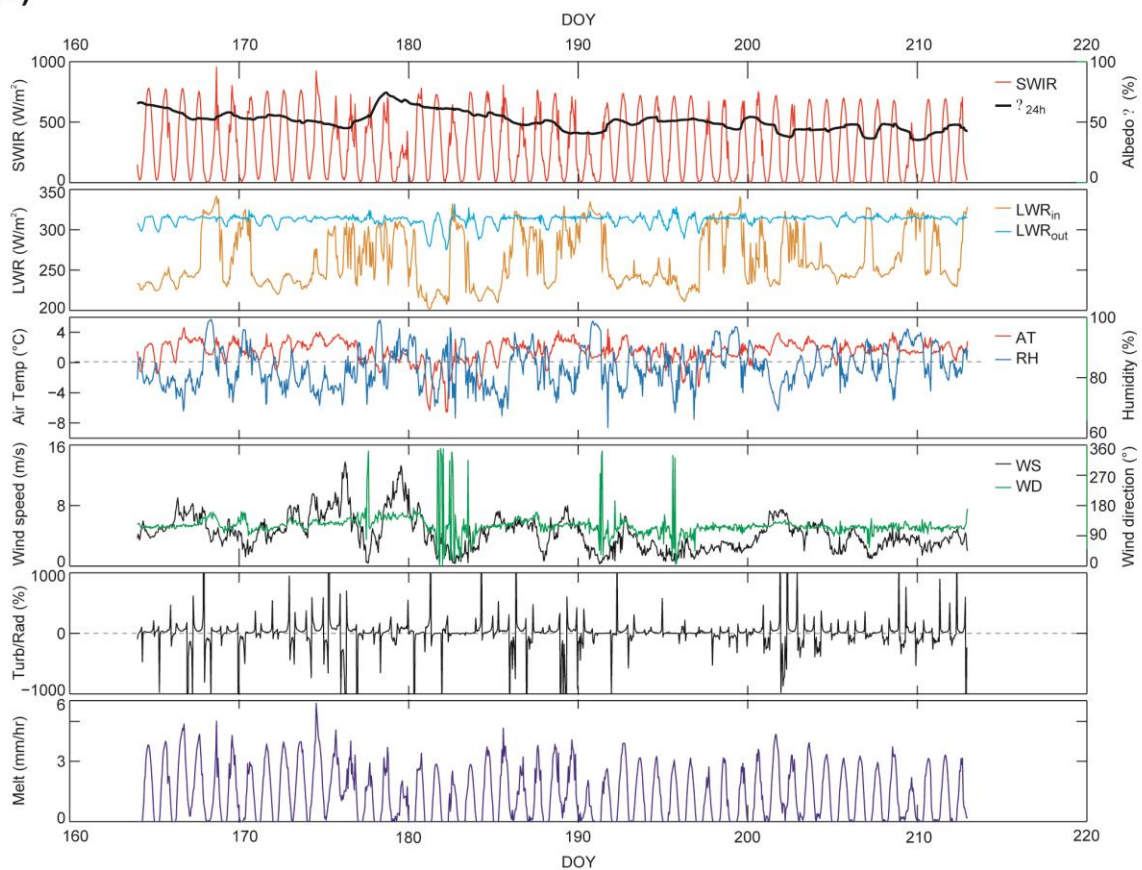

(B)

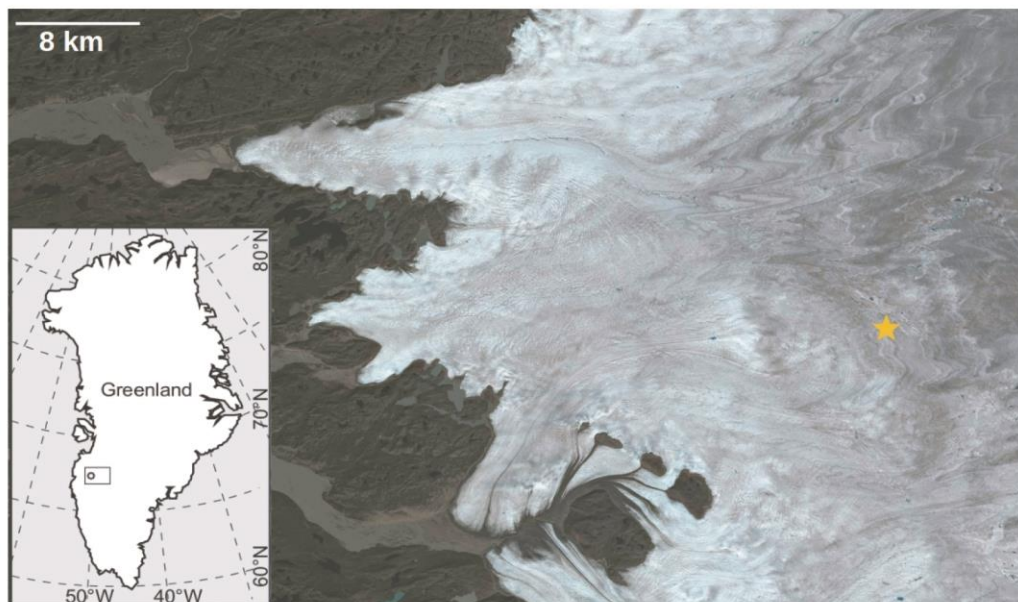

519

520

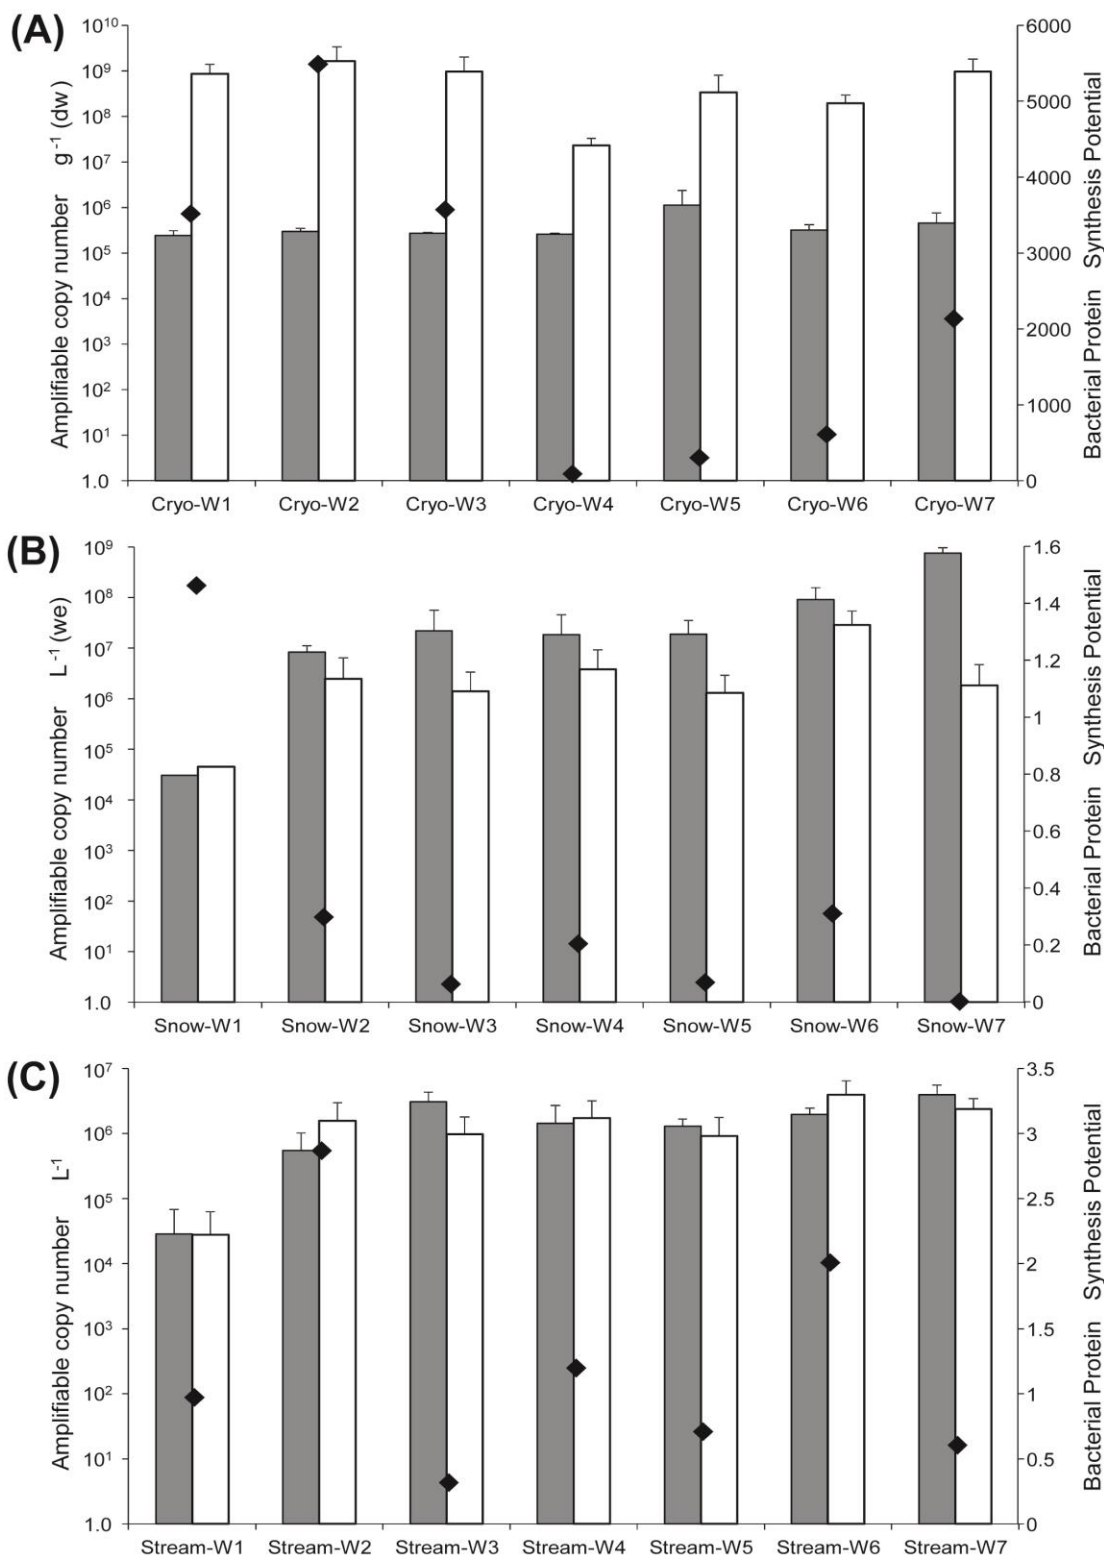

521

522



(A) PCoA overview of habitat based differences

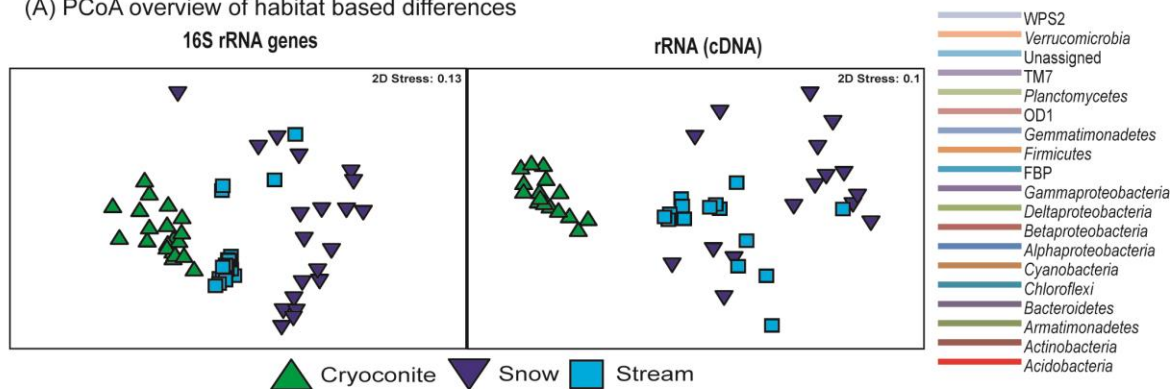

(B) Community composition (phylum/proteobacterial class)

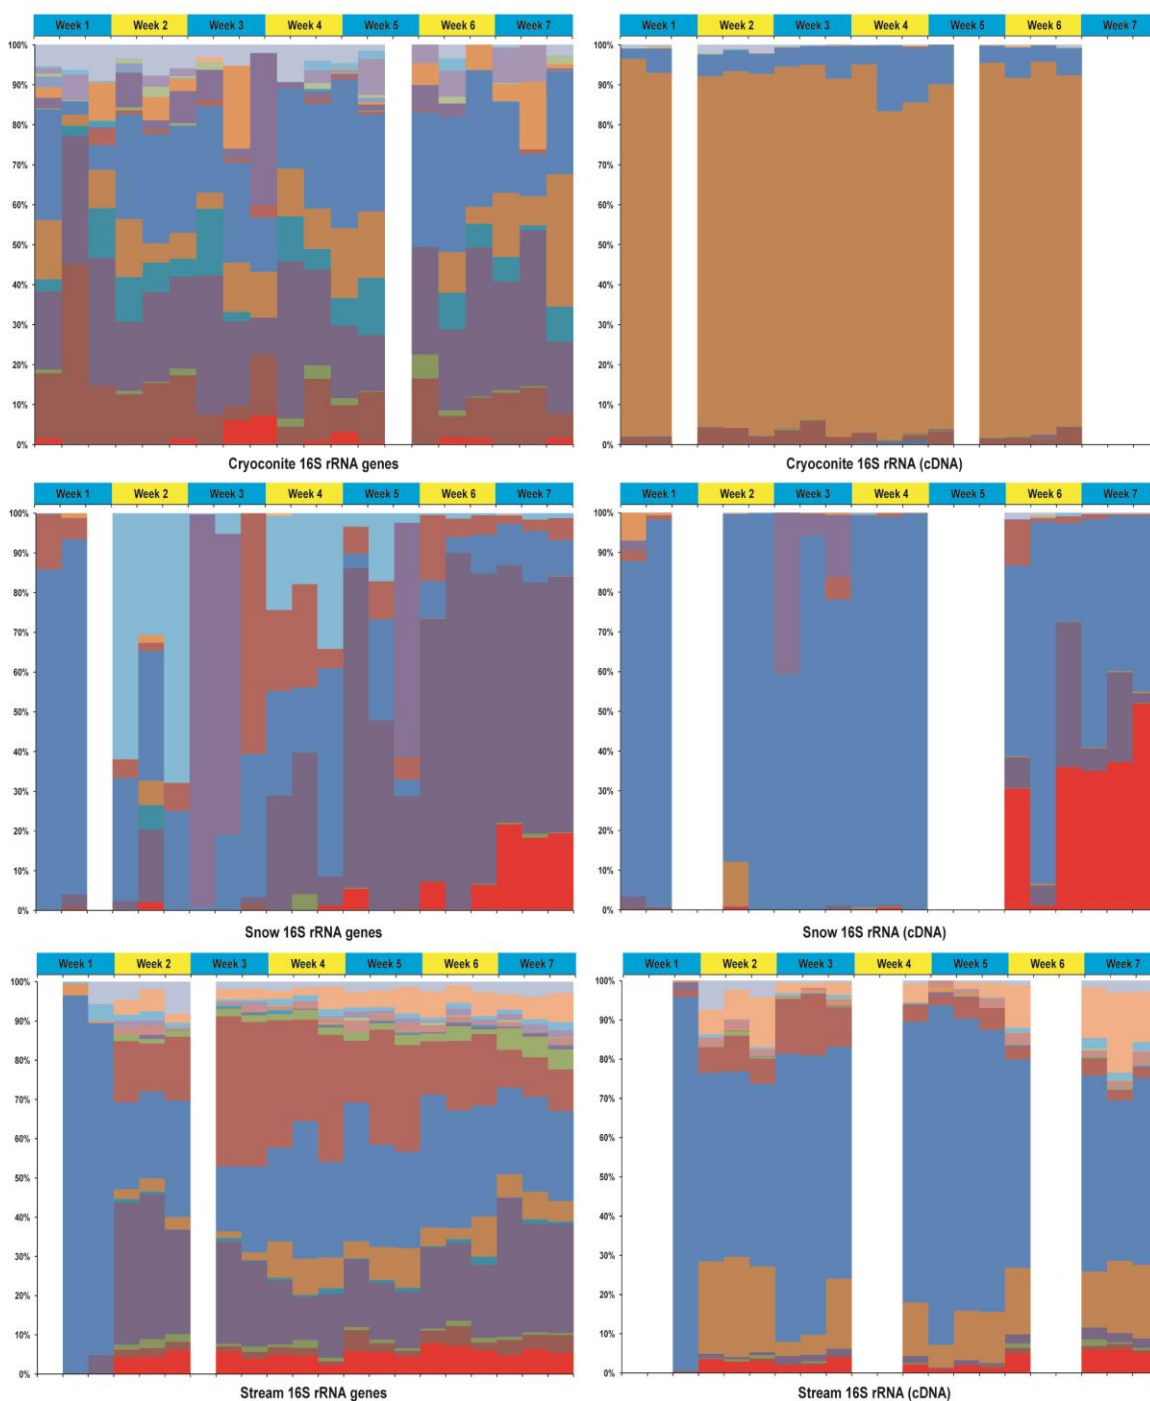

(A) Cryoconite

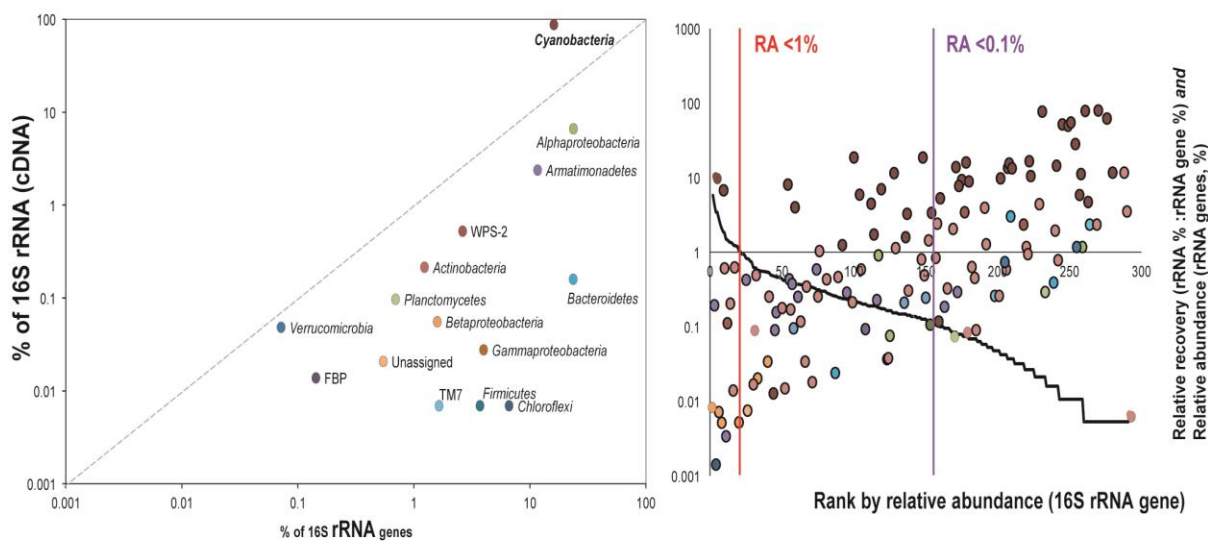

(B) Snow

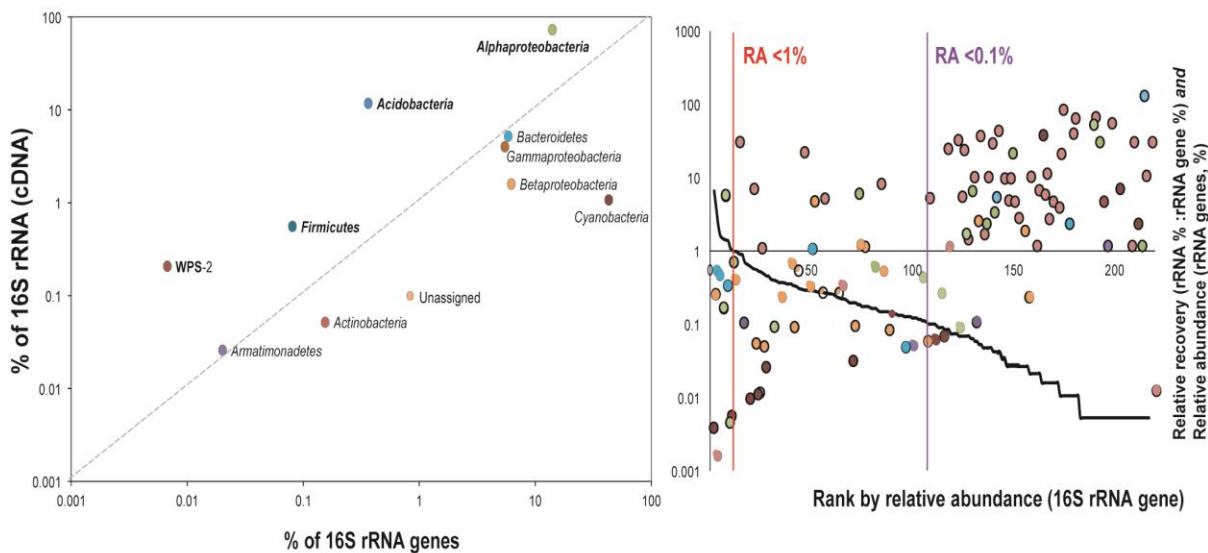

(C) Stream

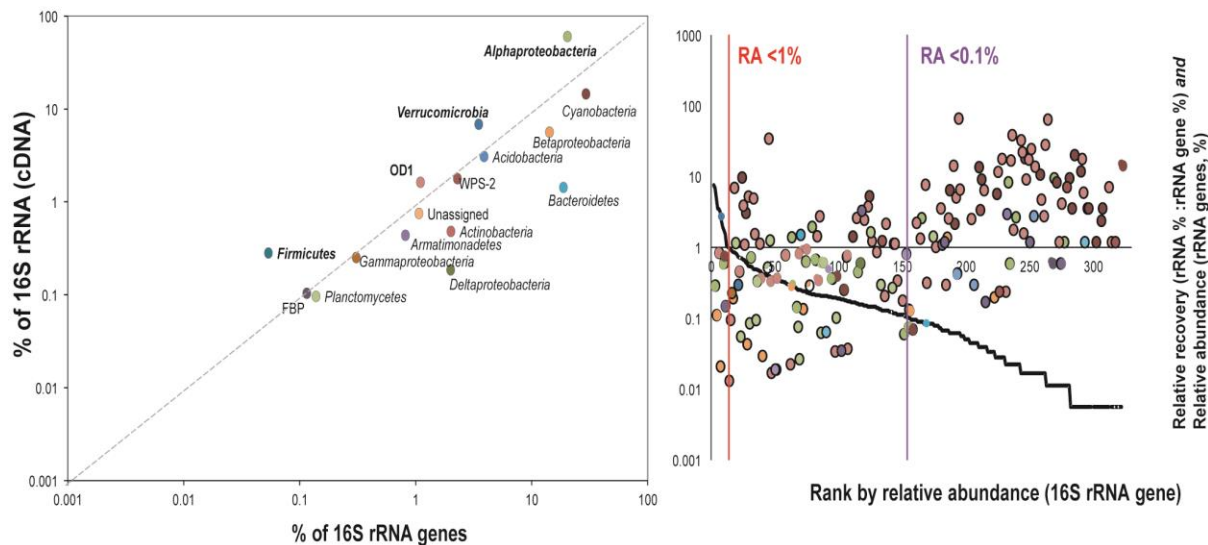

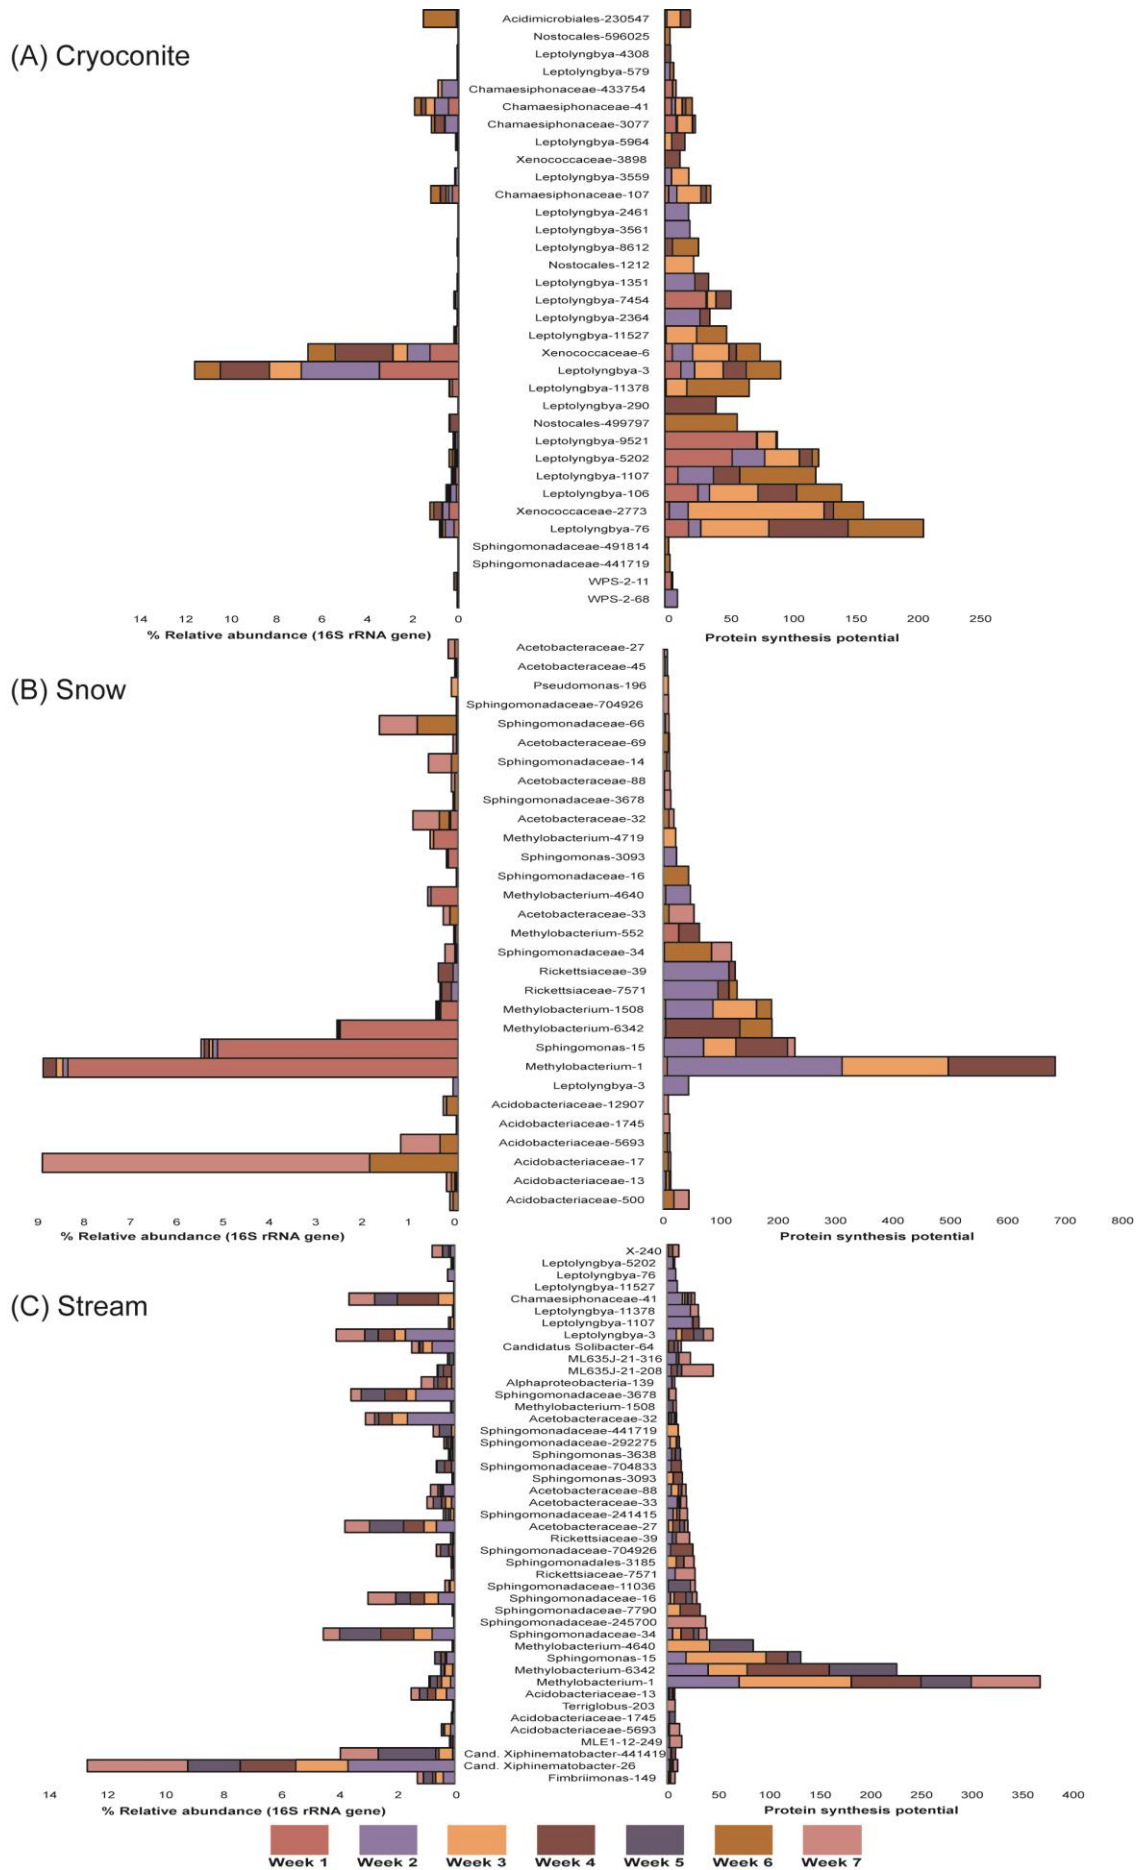

| Table 1: Cumulative Protein Synthesis Potential (PSP) and relatives of keystone OTUs present in 16S rRNA gene profiles of cryoconite (Cryo), snow and stream habitats |                |             |               |               |               |          |                                                     |            |      |                                                           |
|-----------------------------------------------------------------------------------------------------------------------------------------------------------------------|----------------|-------------|---------------|---------------|---------------|----------|-----------------------------------------------------|------------|------|-----------------------------------------------------------|
| Greengenes-OTU                                                                                                                                                        | Phylum         | Betweenness | Cryo-PSP      | Snow-PSP      | Stream-PSP    | Relative | Taxon                                               | Accession  | % ID | Habitat                                                   |
| <i>Sphingomonadaceae</i> -14                                                                                                                                          | Proteobacteria | 7.17        | 1.59          | <b>10.54</b>  | 3.93          | CER      | Uncultured bacterium clone Bysf-47-Sf10-014         | HQ622730.1 | 99   | Austre Lovénbreen, Svalbard - glacier ice core            |
|                                                                                                                                                                       |                |             |               |               |               | CNR      | <i>Sphingopyxis</i> sp. JJ2203                      | JX304649.1 | 98   | Jangsu-gun, South Korea - lake                            |
| <i>Comamonadaceae</i> -5                                                                                                                                              | Proteobacteria | 6.25        | 0.25          | <b>1.89</b>   | 1.30          | CER      | <i>Polaromonas</i> sp. MDB2-14                      | JX949585.1 | 99   | China - glacier                                           |
|                                                                                                                                                                       |                |             |               |               |               | CNR      | <i>Polaromonas</i> sp. MDB2-14                      | JX949585.1 | 99   | China - glacier                                           |
| <i>Methylobacterium</i> -1                                                                                                                                            | Proteobacteria | 4.99        | -             | <b>405.88</b> | 368.26        | CER      | Marine bacterium MSC10                              | EU753147.1 | 99   | Nahant, Massachusetts - tidal flat sand                   |
|                                                                                                                                                                       |                |             |               |               |               | CNR      | Marine bacterium MSC10                              | EU753147.1 | 99   | Nahant, Massachusetts - tidal flat sand                   |
| <i>Sphingomonadaceae</i> -34                                                                                                                                          | Proteobacteria | 4.75        | 4.63          | <b>118.83</b> | 39.16         | CER      | Uncultured bacterium clone QA4_1_042                | LC076727.1 | 99   | Qaanaaq Glacier, Greenland - cryoconite granules          |
|                                                                                                                                                                       |                |             |               |               |               | CNR      | <i>Novosphingobium</i> sp. STM-24                   | LN890294.1 | 96   | Freshwater                                                |
| <i>Acetobacteraceae</i> -27                                                                                                                                           | Proteobacteria | 2.92        | 0.50          | 7.00          | <b>20.32</b>  | CER      | Uncultured bacterium clone Ms-10-Fx11-2-091         | AB990033.1 | 99   | USA:Alaska - environmental_sample                         |
|                                                                                                                                                                       |                |             |               |               |               | CNR      | Acetobacteraceae bacterium LX45                     | KC921158.1 | 99   | Ginger foundation - soil                                  |
| <i>Xenococcaceae</i> -6                                                                                                                                               | Cyanobacteria  | 2.88        | <b>76.36</b>  | 2.00          | -             | CER      | Uncultured cyanobacterium clone FQSS103             | EF522323.1 | 99   | Rocky Mountain - endolithic sandstone community           |
|                                                                                                                                                                       |                |             |               |               |               | CNR      | <i>Phormidium</i> sp. CCALA 726                     | GQ504036.1 | 92   | Ny-Ålesund, Svalbard, Arctic                              |
| <i>Xenococcaceae</i> -2773                                                                                                                                            | Cyanobacteria  | 2.54        | <b>159.23</b> | -             | 0.25          | CER      | Uncultured cyanobacterium clone FQSS103             | EF522323.1 | 98   | Rocky Mountain, USA - endolithic sandstone community      |
|                                                                                                                                                                       |                |             |               |               |               | CNR      | <i>Chroococcus</i> sp. VP2-07                       | GQ504036.1 | 91   | Italy and Spain - fountains                               |
| <i>Sphingomonas</i> -15                                                                                                                                               | Proteobacteria | 2.15        | -             | <b>147.50</b> | 132.00        | CER      | Uncultured bacterium clone Bysf-47-Sf10-014         | KP296188.1 | 99   | Antarctic - surface seawater                              |
|                                                                                                                                                                       |                |             |               |               |               | CNR      | <i>Sphingomonas</i> sp. UYEF32                      | KU060875.1 | 99   | King George Island, Antarctica - exfoliation rock         |
| <i>Sphingomonadaceae</i> -16                                                                                                                                          | Proteobacteria | 1.83        | 3.61          | <b>44.00</b>  | 29.32         | CER      | Uncultured bacterium clone Bysf-47-Sf10-014         | JX967335.1 | 99   | Norway - granite outcrop                                  |
|                                                                                                                                                                       |                |             |               |               |               | CNR      | <i>Blastomonas</i> sp. TW1                          | AY704922.1 | 96   | Biofilm - drinking water                                  |
| <i>Methylobacterium</i> -1508                                                                                                                                         | Proteobacteria | 1.38        | -             | <b>184.50</b> | 9.00          | CER      | Uncultured bacterium clone LIB079_B_C08             | KM852235.1 | 99   | Biofilm - drinking water                                  |
|                                                                                                                                                                       |                |             |               |               |               | CNR      | <i>Methylobacterium brachiatum</i> strain ZJ0902B96 | KU173699.1 | 98   | East China sea - surface seawaters                        |
| <i>Leptolyngbya</i> -290                                                                                                                                              | Cyanobacteria  | 1.09        | <b>41.00</b>  | -             | -             | CER      | Uncultured cyanobacterium clone H-D14               | DQ181732.1 | 99   | East Antarctic lakes - microbial mat                      |
|                                                                                                                                                                       |                |             |               |               |               | CNR      | <i>Phormidesmis</i> sp. LD30 5700 TP                | LN849930.1 | 98   | Western Himalaya - biological soil crust                  |
| <i>Acetobacteraceae</i> -32                                                                                                                                           | Proteobacteria | 1.08        | -             | <b>18.40</b>  | 9.23          | CER      | Uncultured bacterium QA4_30_153                     | LC076735   | 98   | Cryoconite, Qaanaaq, Greenland                            |
|                                                                                                                                                                       |                |             |               |               |               | CNR      | <i>Acetobacter pasteurianus</i> NBRC 3225           | AB680032.1 | 93   | Culture collection                                        |
| <i>Leptolyngbya</i> -3                                                                                                                                                | Cyanobacteria  | 0.75        | <b>92.80</b>  | 44.00         | 45.35         | CER      | Uncultured cyanobacterium clone LH16_269            | KM112118.1 | 99   | McMurdo Dry Valley Lakes, Antarctica - benthic mats       |
|                                                                                                                                                                       |                |             |               |               |               | CNR      | <i>Phormidesmis priestleyi</i> ANT.L66.1            | AY493581.1 | 99   | Antarctic lake - benthic microbial mat                    |
| <i>Leptolyngbya</i> -106                                                                                                                                              | Cyanobacteria  | 0.51        | <b>141.64</b> | -             | 6.67          | CER      | Uncultured bacterium clone IT2-66                   | KX247359.1 | 98   | Zhadang, China - glacier forefield                        |
|                                                                                                                                                                       |                |             |               |               |               | CNR      | <i>Phormidesmis priestleyi</i> ANT.LG2.4            | AY493580.1 | 98   | Antarctic lake - benthic microbial mat                    |
| <i>Leptolyngbya</i> -76                                                                                                                                               | Cyanobacteria  | 0.51        | <b>207.39</b> | -             | 8.43          | CER      | Cyanobacterium cWHL-1                               | HQ230236.1 | 99   | Ward Hunt Island, Ward Hunt Lake, Canada - snow           |
|                                                                                                                                                                       |                |             |               |               |               | CNR      | <i>Phormidesmis priestleyi</i> ANT.LG2.4            | AY493580.1 | 98   | Antarctic lake - benthic microbial mat                    |
| <i>Methylobacterium</i> -6342                                                                                                                                         | Proteobacteria | 0.20        | -             | 185.00        | <b>226.77</b> | CER      | Uncultured alphaproteobacterium clone CN-2_B05      | EF219937.1 | 99   | Antarctica, unvegetated soil environments at Coal Nunatak |
|                                                                                                                                                                       |                |             |               |               |               | CNR      | <i>Methylobacterium tardum</i> strain IHBB 11162    | KR085941.1 | 99   | Suraj Tal, Trans Himalayas - Lake Water                   |

## REFERENCES

- Anesio AM, Sattler B, Foreman C, Telling J, Hodson A, Tranter M *et al* (2010). Carbon fluxes through bacterial communities on glacier surfaces. *Annals of Glaciology* **51**: 32-40.
- 530 Bhatia MP, Das SB, Xu L, Charette MA, Wadham JL, Kujawinski EB (2013a). Organic carbon export from the Greenland ice sheet. *Geochimica et Cosmochimica Acta* **109**: 329-344.
- 535 Bhatia MP, Kujawinski EB, Das SB, Breier CF, Henderson PB, Charette MA (2013b). Greenland meltwater as a significant and potentially bioavailable source of iron to the ocean. *Nature Geoscience* **6**: 274-278.
- Björkman MP, Zarsky JD, Kühnel R, Hodson A, Sattler B, Psenner R (2014). Microbial cell retention in a melting High Arctic snowpack, Svalbard. *Arctic, Antarctic, and Alpine Research* **46**: 471-482.
- 540 Blazewicz SJ, Barnard RL, Daly RA, Firestone MK (2013). Evaluating rRNA as an indicator of microbial activity in environmental communities: limitations and uses. *ISME Journal* **7**: 2061-2068.
- 545 Budyko MI (1969). The effect of solar radiation variations on the climate of the earth. *Tellus* **21**: 611-619.
- 550 Cameron KA, Hagedorn B, Dierer M, Christner BC, Choquette K, Sletten R *et al* (2014). Diversity and potential sources of microbiota associated with snow on western portions of the Greenland Ice Sheet. *Environmental Microbiology*: **17**: 594-609.
- 555 Cameron KA, Stibal M, Zarsky JD, Gözdereliler E, Schostag M, Jacobsen CS (2015). Supraglacial bacterial community structures vary across the Greenland ice sheet. *FEMS microbiology ecology* **92**: fiv164.
- 560 Cameron KA, Stibal M, Hawkings JR, Mikkelsen AB, Telling J, Kohler TJ *et al* (2017). Meltwater export of prokaryotic cells from the Greenland ice sheet. *Environmental microbiology* **19**: 524-534.
- Chistoserdova L, Chen S-W, Lapidus A, Lidstrom ME (2003). Methylo-trophy in *Methylobacterium extorquens* AM1 from a genomic point of view. *Journal of Bacteriology* **185**: 2980-2987.
- 565 Chistoserdova L (2011). Modularity of methylo-trophy, revisited. *Environmental Microbiology* **13**: 2603-2622.

- 570 Christmas NA, Barker G, Anesio AM, Sánchez-Baracaldo P (2016). Genomic mechanisms for cold tolerance and production of exopolysaccharides in the Arctic cyanobacterium *Phormidesmis priestleyi* BC1401. *BMC genomics* **17**: 533.
- 575 Cook JM, Hodson AJ, Anesio AM, Hanna E, Yallop M, Stibal M *et al* (2012). An improved estimate of microbially mediated carbon fluxes from the Greenland ice sheet. *Journal of Glaciology* **58**: 1098-1108.
- Cook JM, Edwards A, Takeuchi N, Irvine-Fynn TDL (2015). Cryoconite: the dark biological secret of the cryosphere. *Progress in Physical Geography* **40**:66-111.
- 580 Cook JM, Edwards A, Bulling M, Mur LA, Cook S, Gokul JK *et al* (2016). Metabolome-mediated biocryomorphic evolution promotes carbon fixation in Greenlandic cryoconite holes. *Environmental Microbiology* **18**: 4674-4686.
- 585 Cook JM, Hodson AJ, Gardner AS, Flanner M, Tedstone AJ, Williamson C *et al* (2017). Quantifying bioalbedo: a new physically based model and discussion of empirical methods for characterising biological influence on ice and snow albedo. *The Cryosphere* **11**: 2611-2632.
- 590 Dieser M, Broemsen ELJE, Cameron KA, King GM, Achberger A, Choquette K *et al* (2014). Molecular and biogeochemical evidence for methane cycling beneath the western margin of the Greenland Ice Sheet. *ISME Journal*. **8**: 2305-2316.
- 595 Dubnick A, Kazemi S, Sharp M, Wadham J, Hawkings J, Beaton A *et al* (2017). Hydrological controls on glacially exported microbial assemblages. *Journal of Geophysical Research: Biogeosciences* **122**: 1049-1061.
- 600 Edwards A, Anesio AM, Rassner SM, Sattler B, Hubbard B, Perkins WT *et al* (2011). Possible interactions between bacterial diversity, microbial activity and supraglacial hydrology of cryoconite holes in Svalbard. *ISME Journal* **5**: 150-160.
- 605 Edwards A, Mur LAJ, Girdwood S, Anesio A, Stibal M, Rassner SM *et al* (2014a). Coupled cryoconite ecosystem structure-function relationships are revealed by comparing bacterial communities in Alpine and Arctic glaciers *FEMS Microbiology Ecology* **89**: 222-237.
- 610 Edwards A, Mur LAJ, Girdwood SE, Anesio AM, Stibal M, Rassner SME *et al* (2014b). Coupled cryoconite ecosystem structure–function relationships are revealed by comparing bacterial communities in alpine and Arctic glaciers. *FEMS Microbiology Ecology* **89**: 222-237.
- 610 Gokul JK, Hodson AJ, Saetnan ER, Irvine-Fynn TD, Westall PJ, Detheridge AP *et al* (2016). Taxon interactions control the distributions of cryoconite bacteria colonizing a High Arctic ice cap. *Molecular ecology* **25**: 3752-3767.

- 615 Hawkings J, Wadham J, Tranter M, Telling J, Bagshaw E, Beaton A *et al* (2016). The Greenland Ice Sheet as a hot spot of phosphorus weathering and export in the Arctic. *Global Biogeochemical Cycles* **30**: 191-210.
- 620 Hell K, Edwards A, Zarsky J, Podmirseg SM, Girdwood S, Pachebat JA *et al* (2013). The dynamic bacterial communities of a melting High Arctic glacier snowpack. *ISME Journal* **7**: 1814-1826.
- 625 Hodson A, Anesio AM, Ng F, Watson R, Quirk J, Irvine-Fynn T *et al* (2007). A glacier respire: Quantifying the distribution and respiration CO<sub>2</sub> flux of cryoconite across an entire Arctic supraglacial ecosystem. *Journal of Geophysical Research-Biogeosciences* **112**.
- 625 Hodson A, Boggild C, Hanna E, Huybrechts P, Langford H, Cameron K *et al* (2010). The cryoconite ecosystem on the Greenland ice sheet. *Annals of Glaciology* **51**: 123-129.
- 630 IPCC (2014). Climate Change 2014: Impacts, Adaptation, and Vulnerability. Part A: Global and Sectoral Aspects. Contribution of Working Group II to the Fifth Assessment Report of the Intergovernmental Panel on Climate Change. In: Change IPoC (ed). IPCC: Geneva, Switzerland.
- 635 Lamarche-Gagnon G, Wadham JL, Lollar BS, Arndt S, Fietzek P, Beaton AD *et al* (2019). Greenland melt drives continuous export of methane from the ice-sheet bed. *Nature* **565**: 73.
- Langford H, Hodson A, Banwart S, Bøggild C (2010). The microstructure and biogeochemistry of Arctic cryoconite granules. *Annals of Glaciology* **51**: 87-94.
- 640 Lennon JT, Jones SE (2011). Microbial seed banks: the ecological and evolutionary implications of dormancy. *Nature Reviews Microbiology* **9**: 119-130.
- 645 Lutz S, Anesio AM, Raiswell R, Edwards A, Newton RJ, Gill F *et al* (2016). The biogeography of red snow microbiomes and their role in melting arctic glaciers. *Nature Communications* **7**: 11968.
- Lutz S, McCutcheon J, McQuaid JB, Benning LG (2018). The diversity of ice algal communities on the Greenland Ice Sheet as revealed by oligotyping. *Microbial Genomics* **4**: e000159.
- 650 Musilova M, Tranter M, Bennett SA, Wadham JL, Anesio A (2015). Stable microbial community composition on the Greenland Ice Sheet. *Frontiers in Microbiology* **6**.
- 655 Musilova M, Tranter M, Wadham J, Telling J, Tedstone A, Anesio AM (2017). Microbially driven export of labile organic carbon from the Greenland ice sheet. *Nature Geoscience* **10**: 360.

- Nordenskiöld AE (1870). *Redogörelse för en expedition til Grönland År 1870*. P.A. Norstedt & Söner: Stockholm.
- 660 Pedrós-Alió C (2012). The rare bacterial biosphere. *Annual Review of Marine Science* **4**: 449-466.
- 665 Peura S, Bertilsson S, Jones RI, Eiler A (2015). Resistant Microbial Cooccurrence Patterns Inferred by Network Topology. *Applied and Environmental Microbiology* **81**: 2090-2097.
- Power ME, Mills LS (1995). The keystone cops meet in Hilo. *Trends in Ecology & Evolution* **10**: 182-184.
- 670 Redeker KR, Chong JPJ, Aguion A, Hodson A, Pearce D (2017). Microbial metabolism directly affects trace gases in (sub) polar snowpacks. *Journal of The Royal Society Interface* **14**: 20170729.
- 675 Ryan J, Smith L, van As D, Cooley S, Cooper M, Pitcher L *et al* (2019). Greenland Ice Sheet surface melt amplified by snowline migration and bare ice exposure. *Science Advances* **5**: eaav3738.
- 680 Ryan JC, Hubbard A, Stibal M, Box JE, team TDSP (2016). Attribution of Greenland's ablating ice surfaces on ice sheet albedo using unmanned aerial systems. *The Cryosphere Discuss* **2016**: 1-23.
- Ryan JC, Hubbard A, Stibal M, Irvine-Fynn TD, Cook J, Smith LC *et al* (2018). Dark zone of the Greenland Ice Sheet controlled by distributed biologically-active impurities. *Nature communications* **9**: 1065.
- 685 Segawa T, Yonezawa T, Edwards A, Akiyoshi A, Tanaka S, Uetake J *et al* (2017). Biogeography of cryoconite forming cyanobacteria on polar and Asian glaciers. *Journal of biogeography* **44**: 2849-2861.
- 690 Smith HJ, Schmit A, Foster R, Littman S, Kuypers MM, Foreman CM (2016). Biofilms on glacial surfaces: hotspots for biological activity. *NPJ Biofilms and Microbiomes* **2**: 16008.
- 695 Smith LC, Yang K, Pitcher LH, Overstreet BT, Chu VW, Rennermalm ÅK *et al* (2017). Direct measurements of meltwater runoff on the Greenland ice sheet surface. *Proceedings of the National Academy of Sciences*: 201707743.
- Steven B, Hesse C, Soghigian J, Dunbar J (2017). Simulated Ribosomal RNA: DNA Ratios Show Potential to Misclassify Active Populations as Dormant. *Applied and environmental microbiology*: AEM. 00696-00617.



700

Stibal M, Lawson EC, Lis GP, Mak KM, Wadham JL, Anesio AM (2010). Organic matter content and quality in supraglacial debris across the ablation zone of the Greenland ice sheet. *Annals of Glaciology* **51**: 1-8.

705

Stibal M, Schostag M, Cameron KA, Hansen LH, Chandler DM, Wadham JL *et al* (2015). Different bulk and active bacterial communities in cryoconite from the margin and interior of the Greenland ice sheet. *Environmental Microbiology Reports* **7**: 293-300.

710

Stibal M, Box JE, Cameron KA, Langen PL, Yallop ML, Mottram RH *et al* (2017). Algae drive enhanced darkening of bare ice on the Greenland ice sheet. *Geophysical Research Letters* **44**. 11,463-11,471.

715

Takeuchi N (2002). Optical characteristics of cryoconite (surface dust) on glaciers: the relationship between light absorbency and the property of organic matter contained in the cryoconite. *Annals of Glaciology* **34**: 409-414.

Tedstone AJ, Bamber JL, Cook JM, Williamson CJ, Fettweis X, Hodson AJ *et al* (2017). Dark ice dynamics of the south-west Greenland Ice Sheet. *Cryosphere* **11**: 2491-2506.

720

Uetake J, Tanaka S, Segawa T, Takeuchi N, Nagatsuka N, Motoyama H *et al* (2016). Microbial community variation in cryoconite granules on Qaanaaq Glacier, NW Greenland. *FEMS microbiology ecology* **92**: fiw127.

725

Van Tricht K, Lhermitte S, Lenaerts JT, Gorodetskaya IV, L'Ecuyer TS, Noël B *et al* (2016). Clouds enhance Greenland ice sheet meltwater runoff. *Nature Communications* **7**: 10266.

Wientjes IGM, Oerlemans J (2010). An explanation for the dark region in the western melt zone of the Greenland ice sheet. *Cryosphere* **4**: 261-268.

730

Wientjes IGM, Van de Wal RSW, Reichert GJ, Sluijs A, Oerlemans J (2011). Dust from the dark region in the western ablation zone of the Greenland ice sheet. *Cryosphere* **5**: 589-601.

735

Wilhelm L, Besemer K, Fasching C, Urich T, Singer GA, Quince C *et al* (2014). Rare but active taxa contribute to community dynamics of benthic biofilms in glacier-fed streams. *Environ Microbiol* **16**: 2514-2524.

740

Williamson C, Anesio A, Cook J, Tedstone A, Poniecka E, Holland A *et al* (2018). Ice algal bloom development on the surface of the Greenland Ice Sheet. *FEMS microbiology ecology* **94**: fiy025.

Williamson C, Cameron KA, Cook JM, Zarsky JD, Stibal M, Edwards A (2019). Glacier algae: a dark past and a darker future. *Frontiers in microbiology* **10**: 524.

745 Yallop ML, Anesio AM, Perkins RG, Cook J, Telling J, Fagan D *et al* (2012).  
Photophysiology and albedo-changing potential of the ice algal community on the surface of  
the Greenland ice sheet. *ISME J* **6**: 2302-2313.

750 Yang K, Smith LC (2016). Internally drained catchments dominate supraglacial hydrology of  
the southwest Greenland Ice Sheet. *Journal of Geophysical Research: Earth Surface* **121**:  
1891-1910.

## Supplementary Methods for: Illuminating the functional rare biosphere of the Greenland Ice Sheet's Dark Zone

### 755 Sample archiving

Other researchers have documented the half-life of the cellular RNA pool (which is heavily dominated by rRNA e.g. Moran *et al.* 2012) of glacial bacteria at the low temperatures typical of ice surfaces is less than one day (Segawa *et al.* 2014), with the implication that rRNA turnover rates are sufficient at the temporal resolution of this study to capture meaningful  
760 changes in protein synthesis potential well within the expected community doubling time (Anesio *et al.* 2010). However, to prevent sample degradation, this necessitates careful sample archiving to stabilize the rRNA and genomic DNA pools of the collected biomass. Therefore, due to the remote location of the field camp, in line with established procedures (e.g. Stibal *et al.* 2015, Cameron *et al.* 2015), Soil Lifeguard RNA/DNA preservative (MO  
765 BIO Laboratories) stabilized samples were stored dark, within crushed ice, prior to transfer to -20°C storage at the Kangerlussuaq International Science Support field laboratory, within three weeks of collection, followed by -80°C archiving at the Aberystwyth laboratory until further processing within four months.

Specifically, in the field, cryoconite samples were aspirated into sterile microcentrifuge tubes  
770 and immersed immediately in Soil Lifeguard RNA/DNA preservative (MO BIO  
Laboratories). Snow samples representing 1.2-1.5L water equivalent were collected in sterile  
whirlpaks (Nasco, Inc.) and melted in the dark at +10°C while meltwater from supraglacial  
stream meltwater (ca. 2L) was collected in whirlpaks. Melted snow was filtered through 0.22  
775  $\mu\text{m}$  Sterivex GP polyethersulfone filters (Millipore) and chemically preserved within 12  
hours of sampling, and stream water was filtered and chemically preserved within 6 hours of  
sampling. The Sterivex filters were connected to tubing which was thoroughly rinsed using  
10% HCl and 70% ethanol to remove potential contaminants from the tubing entering the  
whirlpak bag. Sterivex filters were filled with 2 mL Soil Lifeguard RNA/DNA preservative  
(MO BIO Laboratories).

780

### Nucleic Acid Extraction

All pre-PCR procedures were conducted aseptically in a bleach-disinfected laminar flow  
hood with certified DNA/RNA free plasticware including aerosol resistant tips. Negative  
extraction controls were prepared using sterivex cartridges and blank cryoconite extraction.

785 Total nucleic acids were co-extracted from cryoconite using the PowerBiofilm™ RNA  
Isolation Kit (MO BIO Laboratories) according to the manufacturer's instructions. 0.2g  
 $\pm 0.05\text{g}$  of wet sediment was used in each extraction. Nucleic acids from snow and stream  
samples were co-extracted using the PowerWater® Sterivex™ RNA Kit (MO BIO  
Laboratories) according to the manufacturer's protocol with minor adjustments for DNA  
790 extraction recommended by MO BIO Laboratories (Dr Emelia DeForce, personal  
communication). Specifically, these steps required the addition of 20  $\mu\text{L}$  beta-  
mercaptoethanol for every 880  $\mu\text{L}$  of solution ST1B, the additional incubation of the sterivex

filter at 70°C for 10 minutes during lysis and the addition of an equal volume of 100% ethanol to buffer ST4. All RNA samples were subjected to DNase treatment using the RTS  
795 DNase™ Kit (MO BIO Laboratories) according to the manufacturer's instructions. Aliquots of each RNA sample were then used as template in first strand cDNA synthesis via reverse transcription with SuperScript™ III Reverse Transcriptase (Invitrogen) and universal 16S rRNA gene region primer 1389R, according to the manufacturer's instructions, for use in downstream PCR applications.

#### 800 16S ribosomal RNA (cDNA) and 16S ribosomal RNA gene quantitative PCR

To estimate 16S rRNA gene and 16S rRNA abundance within the samples, two microliters of each DNA extract or reverse transcriptase product was used as template in 20 µL reactions consisting of 1× SensiFast SYBR (no ROX) qPCR mixture (BioLine, Ltd) and 16S rRNA primers 27F (5'-AGAGTTTGATCCTGGCTCAG) and 1389R (5'-  
805 ACGGGCGGTGTGTACAAG) amplified for 35 cycles in a Mic real time PCR cycler (BioMolecularSystems, Inc.) The copy number of gene and 16S rRNA molecules was estimated from a plasmid-borne 27F-1389R standard, and converted to gram dry weight cryoconite or meltwater stream volume or water equivalent volume of snow (by reference to the volume of samples filtered) respectively. We note the uncertainties associated with  
810 extraction efficiencies for different microbial taxa within environmental samples subjected to nucleic acid extraction, therefore we present the copy number of 16S rRNA genes and 16S rRNA as the *amplifiable* copy number per unit sample.

#### 16S ribosomal RNA gene amplicon sequencing

815 Cryoconite, snow and stream DNA and RNA samples were prepared for paired end MiSeq sequencing (Illumina). Using a 3 stage PCR method, the bacterial 16S rRNA V3-V4

hypervariable region was amplified for the attachment of Nextera XT dual indices and Illumina sequencing adapters.

The primers used for 16S rRNA gene specific amplification were universal 16S primers 27F  
820 and 1389R using cycling conditions of 95 °C for 5 mins (initial denaturation); 30 cycles: 95 °C for 30 secs (denaturation), 60 °C for 30 secs (annealing), 72 °C for 45 secs (extension); 72 °C for 7 mins (final extension). Amplicons produced were used as template for nested PCRs with Nextera primers (5'-TCGTCGGCAGCGTCAGATGTGTATAAGAGACAG-3' and 5'-GTCTCGTGGGCTCGGAGATGTGTATAAGAGACAG-3') (Klindworth et al, 2013) in  
825 12.5µL Platinum Taq Mix PCR reactions, as per manufacturer's instructions, using cycling conditions of 95°C for 3 mins (initial denaturation); 25 cycles: 95°C for 30s (denaturation), 55°C for 30s (annealing), 72°C for 30s (extension); 72°C for 5 mins (final extension). Amplification was confirmed by gel electrophoresis on 1% agarose before products were used as template in the third PCR using Platinum Taq Mix and the Nextera XT Index Kit  
830 (Illumina) to obtain unique combinations of the N7 and S5 primer barcodes per sample (SUPPLEMENTARY TABLE 1). Cycling conditions were 95° for 3 mins (initial denaturation); 8 cycles of 95°C for 30s (denaturation), 55°C for 30s (annealing), 72°C for 30s (extension); 72°C for 5 mins (final extension). Amplicons were purified using the Montage™ PCR plate filtration system (Millipore) prior to quantification on an Epoch™  
835 spectrophotometer (BioTek). Products were then normalised to the lowest common concentration for each library (DNA 5ng/µL; cDNA 0.8ng/µL) and pooled before electrophoresis on 1% agarose gel for purification via gel extraction using the Qiagen Gel Extraction Kit (Qiagen) as per manufacturer's instructions. Libraries were sequenced at the IBERS Translational Sequencing Facility (IBERS Phenomics Centre, Gogerddan,  
840 Aberystwyth, Ceredigion SY23 3EE) on the Illumina MiSeq® platform (Illumina Inc., San Diego, CA, USA) using the MiSeq® Reagent Kit, version 3 (Illumina Inc., San Diego, CA,

USA). Initial processing of Illumina MiSeq® sequence data was performed in BaseSpace® (Illumina Inc., San Diego, CA, USA). Data were demultiplexed and the indices removed. Reads were trimmed to remove read-through into the adaptor sequence at the 3' end. Sequence files were generated in the fastq format and imported into QIIME 1.9.0 for merging of paired end reads.

### Sequence Processing and Analysis

Resulting sequences were quality filtered and processed in QIIME 1.9.0 (Caporaso *et al.*, 2010) using default quality filters unless otherwise stated. Paired end sequences were joined and probed for chimeras using USearch6.1 (Edgar, 2010) which were then removed. Operational taxonomic units (OTUs) were then assigned at 97% identity using a reference based UCLUST algorithm (Edgar, 2010) and the Greengenes 13\_8 database, August 2013 version (DeSantis *et al.*, 2006) before OTU tables were generated, and processed for rarefaction curves and alpha diversity indices. Multivariate analysis was performed in PRIMER 6/PERMANOVA+ (PRIMER-E Ltd, Plymouth UK). Permutational multivariate analysis of variation (PERMANOVA), principal coordinates analysis (PCO) were performed as described previously (Edwards *et al.*, 2014) with Bray Curtis transformations at the fourth root used for OTU relative abundance. One-way ANOVA was performed in Minitab 17. For samples with both 16S rRNA gene and 16S rRNA profiles, protein synthesis potential (sensu Deneff *et al.*, 2016) was defined as the ratio of the relative abundances of each OTU. Community analysis using pairwise Spearman correlations in R was able to identify OTUs with high *betweenness* centrality (shortest number of paths between any two other OTUs passing through that OTU) (Peura *et al.*, 2015), high *degree* centrality (the number of associations an OTU has) and high *closeness* centrality (the average distance between two OTUs) measures (Berry and Widder, 2014). These taxa play a central role in the ecosystem and are recognised as “bottleneck or keystone taxa” (Paine, 1966, Mills *et al.*, 1993, Cotte-

Jone and Whittaker, 2012). Sequences are available on EBI-SRA under the study accession number PRJNA318626.

## References

870 Anesio, A. M., Sattler, B., Foreman, C., Telling, J., Hodson, A., Tranter, M., & Psenner, R. (2010). Carbon fluxes through bacterial communities on glacier surfaces. *Annals of Glaciology*, 51(56), 32-40.

Berry, D. and Widder, S. (2014) Deciphering microbial interactions and detecting keystone species with co-occurrence networks. *Front. Microbiol.* 5: 1–14.

875 Cameron, K.A., Stibal, M., Zarsky, J.D., Gözdereliler, E., Schostag, M. and Jacobsen, C.S., 2015. Supraglacial bacterial community structures vary across the Greenland ice sheet. *FEMS microbiology ecology*, 92(2), fiv164.

Caporaso, J. G., Kuczynski, J., Stombaugh, J., Bittinger, K., Bushman, F. D., Costello, E. K., Fierer, N., Gonzalez Pena, A., Goodrich, J. K., Gordon, J. I., Huttley, G. A., Kelley, S. T.,  
880 Knights, D., Koenig, J. E., Ley, R. E., Lozupone, C. A., Mcdonald, D., Muegge, B. D.,  
Pirrung, M., Reeder, J., Sevinsky, J. R., Turnbaugh, P. J., Walters, W. A., Widmann, J.,  
Yatsunenko, T., Zaneveld, J. & Knight, R. 2010. QIIME allows analysis of high-throughput  
community sequencing data. *Nature Methods*, 7, 335 - 336.

Cottee-Jones, Henry Eden WWhittaker, Robert J. 2012. The keystone species concept: a  
885 critical appraisal. *Frontiers of Biogeography*, 4(3).

Desantis, T. Z., Hugenholtz, P., Larsen, N., Rojas, M., Brodie, E. L., Keller, K., Huber, T.,  
Dalevi, D., Hu, P. & Andersen, G. L. 2006. Greengenes, a chimera-checked 16S rRNA gene  
database and workbench compatible with ARB. *Appl Environ Microbiol*, 72, 5069-72.

Denef, V. J., Fujimoto, M., Berry, M. A. & Schmidt, M. L. 2016. Seasonal succession leads  
890 to habitat-dependent differentiation in ribosomal RNA:DNA ratios among freshwater lake  
bacteria. *Frontiers in Microbiology*.

Edgar, R. C. 2010. Search and clustering orders of magnitude faster than BLAST. *Bioinformatics*, 26, 2460-2461.

Klindworth, A., Pruesse, E., Schweer, T., Peplies, J., Quast, C., Horn, M. and Glöckner, F.O.,  
895 2013. Evaluation of general 16S ribosomal RNA gene PCR primers for classical and next-  
generation sequencing-based diversity studies. *Nucleic acids research*, 41(1),e1-e1.

Mills, L.S., Soulé, M.E., Doak, D.F. 1993. The Keystone-Species Concept in Ecology and  
Conservation. *BioScience*, 43(4), 219–224.

Moran, M.A., Satinsky, B., Gifford, S.M., Luo, H., Rivers, A., Chan, L.K., Meng, J.,  
900 Durham, B.P., Shen, C., Varaljay, V.A. and Smith, C.B., 2013. Sizing up  
metatranscriptomics. *The ISME journal*, 7(2), 237.

Paine, R. T. 1966. Food Web Complexity and Species Diversity. *The American Naturalist*  
100(910), 65-75.

Peura, S., Bertilsson, S., Jones, R. I. & Eiler, A. 2015. Resistant microbial cooccurrence  
905 patterns inferred by network topology. *Applied and Environmental Microbiology*, 81, 2090-7.

Segawa, T., Ishii, S., Ohte, N., Akiyoshi, A., Yamada, A., Maruyama, F., Li, Z., Hongoh, Y.  
and Takeuchi, N., 2014. The nitrogen cycle in cryoconites: naturally occurring nitrification-  
denitrification granules on a glacier. *Environmental microbiology*, 16(10),3250-3262.

Stibal, M., Schostag, M., Cameron, K.A., Hansen, L.H., Chandler, D.M., Wadham, J.L. and  
910 Jacobsen, C.S., 2015. Different bulk and active bacterial communities in cryoconite from the



margin and interior of the Greenland ice sheet. Environmental microbiology reports, 7(2),.293-300.

Wang, Q., Garrity, G. M., Tiedje, J. M. & Cole, J. R. 2007. Naive Bayesian classifier for rapid assignment of rRNA sequences into the new bacterial taxonomy. Appl Environ Microbiol, 73, 5261-7.

## Supplementary Methods for: Illuminating the functional rare biosphere of the Greenland Ice Sheet's Dark Zone

SUPPLEMENTARY TABLE 1: Dual Index Primers for the 96 sample Nextera XT Index Kit

| <b>Index 1 – I7</b> | <b>SEQUENCE</b> |
|---------------------|-----------------|
| N701                | TAAGGCGA        |
| N702                | CGTACTAG        |
| N703                | AGGCAGAA        |
| N704                | TCCTGAGC        |
| N705                | GGACTCCT        |
| N706                | TAGGCATG        |
| N707                | CTCTCTAC        |
| N708                | CAGAGAGG        |
| N709                | GCTACGCT        |
| N710                | CGAGGCTG        |
| N711                | AAGAGGCA        |
| N712                | GTAGAGGA        |

  

| <b>Index 2 – I5</b> | <b>SEQUENCE</b> |
|---------------------|-----------------|
| S501                | TAGATCGC        |
| S502                | CTCTCTAT        |
| S503                | TATCCTCT        |
| S504                | AGAGTAGA        |
| S505                | GTAAGGAG        |
| S506                | ACTGCATA        |
| S507                | AAGGAGTA        |
| S508                | CTAAGCCT        |

SUPPLEMENTARY TABLE 2: Permutational analysis of variance (PERMANOVA) across 16S rRNA gene and 16S rRNA (“nucleic acid”), day of year ad cryoconite, snow, and stream habitats.

| Test                     | Pseudo <i>F</i> | <i>p</i> |
|--------------------------|-----------------|----------|
| Habitats                 | 13.796          | 0.0001   |
| Cryoconite DNA vs RNA    | 22.536          | 0.0001   |
| Cryoconite DNA over time | 1.0092          | 0.4477   |
| Cryoconite RNA over time | 1.6963          | 0.0254   |
| Snow DNA vs RNA          | 5.3008          | 0.0001   |
| Snow DNA over time       | 2.6525          | 0.0001   |
| Snow RNA over time       | 2.9937          | 0.0003   |
| Stream DNA vs RNA        | 7.1009          | 0.0001   |
| Stream DNA over time     | 2.4599          | 0.0041   |
| Stream RNA over time     | 1.4237          | 0.1069   |

SUPPLEMENTARY TABLE 3: Identity and abundance of contaminating sequences detected in DNA extraction controls

| OTU           | Greengenes ID              | No of reads in NTC | BLAST ID                                 | Accession No | %ID |
|---------------|----------------------------|--------------------|------------------------------------------|--------------|-----|
| denovo-87257  | <i>g_Salinibacterium</i>   | 16                 | <i>Leifsonia</i> sp. URHE0078            | LN876553.1   | 99  |
| denovo-114112 | <i>f_Microbacteriaceae</i> | 12                 | <i>Salinibacterium amurskyense</i> IC A9 | KU925169.1   | 98  |
| denovo-125684 | <i>o_Streptophyta</i>      | 11                 | <i>Roya obtusa</i>                       | KU646496.1   | 97  |
| denovo-90892  | <i>g_Leptolyngbya</i>      | 7                  | <i>Phormidesmis priestleyi</i> ANT.L66.1 | AY493581.1   | 99  |
| denovo-96273  | <i>g_Kocuria</i>           | 4                  | <i>Kocuria subflava</i>                  | NR_144586.1  | 99  |
| denovo-67624  | <i>f_Sphingomonadaceae</i> | 4                  | <i>Polymorphobacter</i> sp. Ap23E        | KX990242.1   | 99  |
| denovo-106624 | <i>f_Microbacteriaceae</i> | 3                  | <i>Salinibacterium amurskyense</i> IC A9 | KU925169.1   | 98  |

SUPPLEMENTARY TABLE 4: The identity of top OTUs present in cryoconite<sup>a</sup>, snow<sup>b</sup> and stream<sup>c</sup> water contributing to 99% of relative abundance per habitat.

| CORE OTU                                  | Closest Environmental Relative                                  |                  |      | Closest Named Relative                                         |                                                               |                  |      |                                                   |
|-------------------------------------------|-----------------------------------------------------------------|------------------|------|----------------------------------------------------------------|---------------------------------------------------------------|------------------|------|---------------------------------------------------|
|                                           | CER                                                             | Accession number | % ID | Habitat                                                        | CNR                                                           | Accession number | % ID | Habitat                                           |
| <i>Streptophyta-0<sup>bc</sup></i>        | Uncultured bacterium clone IC4001                               | HQ622719.1       | 99   | Austre Lovénbreen, Svalbard - glacier surface ice              | <i>Roya obtusa</i> culture-collection SAG:168.80 chloroplast, | KU646496.1       | 97   | Freshwater algae                                  |
| <i>Methylobacterium-1<sup>bc</sup></i>    | Marine bacterium MSC10                                          | EU753147.1       | 99   | Nahant, Massachusetts - tidal flat sand                        | Marine bacterium MSC10                                        | EU753147.1       | 99   | Nahant, Massachusetts - tidal flat sand           |
| <i>Leptolyngbya-3<sup>ac</sup></i>        | Uncultured cyanobacterium clone LH16_269                        | KM112118.1       | 99   | McMurdo Dry Valley Lakes, Antarctica - benthic mats            | <i>Phormidesmis priestleyi</i> ANT.L66.1                      | AY493581.1       | 99   | Antarctic lake - benthic microbial mat            |
| <i>Sphingobacteriaceae-4<sup>ac</sup></i> | Uncultured <i>Actinobacterium</i> clone IC4008                  | HQ622724.1       | 99   | Austre Lovénbreen, Svalbard - glacier ice core                 | <i>Solitalea koreensis</i> strain R2A36-4                     | NR_044568.1      | 90   | Soil bacterium                                    |
| <i>Comamonadaceae-5<sup>bc</sup></i>      | <i>Polaromonas</i> sp. MDB2-14                                  | JX949585.1       | 99   | China - glacier                                                | <i>Polaromonas</i> sp. MDB2-14                                | JX949585.1       | 99   | China - glacier                                   |
| <i>Xenococcaceae-6<sup>ac</sup></i>       | Uncultured cyanobacterium clone FQSS103                         | EF522323.1       | 99   | Rocky Mountain - endolithic sandstone community                | <i>Phormidium</i> sp. CICALA 726                              | GQ504036.1       | 92   | Ny-Ålesund, Svalbard, Arctic                      |
| <i>Hymenobacter-7<sup>b</sup></i>         | Uncultured bacterium clone Bysf-33-Sf11-054                     | AB991133.1       | 99   | Byron Glacier, USA: Alaska - glacier surface                   | <i>Hymenobacter</i> sp. Ht11                                  | JX949241.1       | 97   | China - glacier                                   |
| <i>Saprospiraceae-8<sup>ac</sup></i>      | Uncultured bacterium clone QA48                                 | LC030301.1       | 100  | Qaanaaq Glacier, North Western Greenland - glacier surface ice | Filamentous bacterium Plant1 Iso8                             | DQ232754.1       | 86   | Activated sludge                                  |
| <i>Sediminibacterium-9<sup>a</sup></i>    | Uncultured <i>Sediminibacterium</i> sp. clone Limnopolar-0.5-B2 | FR848659.1       | 99   | Byers Peninsula, Antarctica - limnopolar lake                  | <i>Vibrionimonas magnilacihabitans</i> strain MU-2            | NR_133888.1      | 99   | Lake Michigan - water sample                      |
| <i>Methylobacterium-10<sup>bc</sup></i>   | Uncultured bacterium clone Bysf-47-Sf10-014                     | AB991014.1       | 99   | Byron Glacier, USA: Alaska - glacier surface                   | <i>Methylobacterium</i> sp. 63                                | JF905617.1       | 99   | Barrientos Island, Antarctica - soil              |
| <i>Acidimicrobiales-12<sup>a</sup></i>    | Uncultured bacterium clone AM 5.5m_4_43                         | HE616493.1       | 99   | Alinen Mustajärvi, Finland - Boreal Lake                       | <i>Actinobacterium</i> TC4                                    | JF510471.1       | 94   | Chalcopyrite bio-heap - leachate                  |
| <i>Sphingomonadaceae-14<sup>ac</sup></i>  | Uncultured bacterium clone Bysf-47-Sf10-014                     | HQ622730.1       | 99   | Austre Lovénbreen, Svalbard - glacier ice core                 | <i>Sphingopyxis</i> sp. JJ2203                                | JX304649.1       | 98   | Jangsu-gun, South Korea - lake                    |
| <i>Sphingomonas-15<sup>bc</sup></i>       | Uncultured bacterium clone Bysf-47-Sf10-014                     | KP296188.1       | 99   | Antarctic - surface seawater                                   | <i>Sphingomonas</i> sp. UYEF32                                | KU060875.1       | 99   | King George Island, Antarctica - exfoliation rock |
| <i>Sphingomonadaceae-16<sup>ac</sup></i>  | Uncultured bacterium clone Bysf-47-Sf10-014                     | JX967335.1       | 99   | Norway - granite outcrop                                       | <i>Blastomonas</i> sp. TW1                                    | AY704922.1       | 96   | Biofilm - drinking water                          |
| <i>Acidobacteriaceae-17<sup>bc</sup></i>  | Uncultured <i>Acidobacteria</i> bacterium clone IC3076          | HQ595216.1       | 99   | Austre Lovénbreen, Svalbard - glacier surface ice              | <i>Granulicella aggregans</i> strain TPB6028                  | NR_115070.1      | 99   | West Russia Tomsk - sphagnum peat                 |
| <i>Streptophyta-19<sup>a</sup></i>        | <i>Carum carvi</i> chloroplast                                  | KR048286.1       | 99   | Unpublished                                                    | <i>Carum carvi</i>                                            | KR048286.1       | 99   | Unpublished                                       |

| CORE OTU                                           | Closest Environmental Relative                                   |                  |      |                                                                              | Closest Named Relative                                           |                  |      |                                                         |
|----------------------------------------------------|------------------------------------------------------------------|------------------|------|------------------------------------------------------------------------------|------------------------------------------------------------------|------------------|------|---------------------------------------------------------|
|                                                    | CER                                                              | Accession number | % ID | Habitat                                                                      | CNR                                                              | Accession number | % ID | Habitat                                                 |
| <i>Thermogemmatissporaceae-21<sup>a</sup></i>      | Uncultured <i>Ktedobacteria</i> bacterium clone UMAB-cl-174      | FR749799.1       | 99   | Antarctic Peninsula - soil                                                   | chloroplast,<br><i>Ktedonobacter racemifer</i> strain DSM 44963  | NR_112949.1      | 89   | Compost                                                 |
| <i>ACK-MI-22<sup>c</sup></i>                       | Uncultured bacterium clone QA4_1_060                             | LC076728.1       | 99   | Qaanaaq Glacier, Greenland - cryoconite granules                             | <i>Candidatus Planktophila limnetica</i> strain MWH-EgelM2-3.acI | FJ428831.1       | 97   | Lake Grossegelsee, Austria - freshwater lake            |
| <i>Phyllobacterium-24<sup>f</sup></i>              | Uncultured bacterium clone PL3-9 16S                             | EU527093.1       | 99   | Palong No.4 glacier, Tibet China - snow                                      | <i>Phyllobacterium</i> sp. MD10                                  | KF358323.1       | 99   | Tibetan Plateau - glacier snow                          |
| <i>Candidatus Xiphinematobacter-26<sup>c</sup></i> | Uncultured <i>Xiphinematobacteriaceae</i> bacterium clone AL5.23 | GU047442.1       | 99   | High-Arctic acidic wetland active layer soil                                 | <i>Spartobacteria</i> bacterium Gsoil 144                        | AB245342.1       | 92   | Ginseng field - soil                                    |
| <i>Acetobacteraceae-27<sup>c</sup></i>             | Uncultured bacterium clone Ms-10-Fx11-2-091                      | AB990033.1       | 99   | USA:Alaska - environmental_sample                                            | <i>Acetobacteraceae</i> bacterium LX45                           | KC921158.1       | 99   | Ginger foundation - soil                                |
| <i>Pseudomonas-28<sup>b</sup></i>                  | <i>Pseudomonas salomonii</i> strain HS9-MRL                      | KX128926.1       | 99   | Pakistan: Siachen Glacier, ice, water and sediment                           | <i>Pseudomonas</i> sp. 36                                        | KX354891.1       | 99   | Antarctic - ornithogenic soil                           |
| <i>Stramenopiles-29<sup>c</sup></i>                | Uncultured bacterium clone BJOH-71                               | KP724732.1       | 99   | South Shetland Archipilego, Antarctica - glacier ice                         | <i>Ochromonas</i> sp. CCMP1393 plastid,                          | KJ877675.1       | 96   | Algal origin                                            |
| <i>Sphingomonas-31<sup>b</sup></i>                 | Uncultured bacterium clone LIB062_A_D01                          | KM851700.1       | 100  | Drinking water biofilm                                                       | <i>Sphingomonas</i> sp. UV9                                      | KR922276.1       | 99   | Antarctic, unpublished                                  |
| <i>Sphingomonadaceae-34<sup>a,b,c</sup></i>        | Uncultured bacterium clone QA4_1_042                             | LC076727.1       | 99   | Qaanaaq Glacier, Greenland - cryoconite granules                             | <i>Novosphingobium</i> sp. STM-24                                | LN890294.1       | 96   | Freshwater                                              |
| <i>Rickettsiaceae-39<sup>b</sup></i>               | Uncultured bacterium clone Malla4.68                             | AM945518.1       | 95   | Arctic tundra - soil                                                         | <i>Candidatus Trichorickettsia mobilis</i> clone 36              | AM945518.1       | 95   | Wastewater plant                                        |
| <i>Chamaesiphonaceae-41<sup>a,c</sup></i>          | Uncultured bacterium clone EpiUMB29                              | FJ849281.1       | 99   | Noatak National Preserve, Alaska - Arctic stream epilithon                   | <i>Chamaesiphon subglobosus</i> PCC 7430                         | AY170472.1       | 98   | (culture collection)                                    |
| <i>Comamonadaceae-44<sup>b</sup></i>               | <i>Variovorax paradoxus</i> strain 11-4(2)                       | KT369961.1       | 99   | Qilian mountain China                                                        | <i>Variovorax paradoxus</i> strain 11-4(2)                       | KT369961.1       | 99   | Qilian mountain, China                                  |
| <i>Pseudomonas-46<sup>b</sup></i>                  | Uncultured bacterium clone MTWL201306-93                         | KX509317.1       | 99   | Rainwater                                                                    | <i>Pseudomonas</i> sp. DMSP-3                                    | KU296913.1       | 99   | Kongsfjorden, Svalbard - Arctic seawater                |
| <i>Ralstonia-52<sup>b</sup></i>                    | Uncultured <i>Ralstonia</i> sp. clone BF64A_B11                  | HM141108.1       | 100  | Borup Fiord, Ellesmere Island, Nunavut, Canada - supraglacial spring outflow | <i>Ralstonia pickettii</i> strain HT16-MRL                       | KP318066.1       | 99   | Hindu Kush mountain range, Chitral - Tirich Mir glacier |
| <i>Micrococcus-70<sup>a</sup></i>                  | <i>Micrococcus</i> sp. strain BAB-5964                           | KX622627.1       | 100  | Soil                                                                         | <i>Micrococcus</i> sp. H-CD9b                                    | KT799848.1       | 100  | Northern Patagonia, Chile - Comau Fjord                 |
| <i>Leptolyngbya-76<sup>a</sup></i>                 | <i>Cyanobacterium</i> cWHL-1                                     | HQ230236.1       | 97   | Ward Hunt Island, Ward Hunt Lake, Canada - snow                              | <i>Cyanobacterium</i> cWHL-1                                     | HQ230236         | 99   | Canadian High Arctic                                    |

| CORE OTU                                    | Closest Environmental Relative                                  |                  |      |                                                           | Closest Named Relative                              |                  |      |                                                  |
|---------------------------------------------|-----------------------------------------------------------------|------------------|------|-----------------------------------------------------------|-----------------------------------------------------|------------------|------|--------------------------------------------------|
|                                             | CER                                                             | Accession number | % ID | Habitat                                                   | CNR                                                 | Accession number | % ID | Habitat                                          |
| <i>Leptolyngbya-106<sup>a</sup></i>         | Uncultured bacterium clone IT2-66                               | KX247359.1       | 98   | Zhadang, China - glacier forefield                        | <i>Cyanobacterium</i> cWHL-1                        | HQ230236.1       | 98   | Canadian High Arctic                             |
| <i>Chamaesiphonaceae-107<sup>a</sup></i>    | Uncultured <i>cyanobacterium</i> clone p660_S12                 | JQ407506.1       | 99   | Greenland - glacier ice                                   | <i>Chroococcales cyanobacterium</i> CYN67           | JQ687333.1       | 98   | Antarctica/New Zealand (not published)           |
| <i>Leptolyngbya-290<sup>a</sup></i>         | Uncultured <i>cyanobacterium</i> clone H-D14                    | DQ181732.1       | 99   | East Antarctic lakes - microbial mat                      | <i>Phormidesmis</i> sp. LD30 5700 TP                | LN849930.1       | 98   | Western Himalaya - biological soil crust         |
| <i>Leptolyngbya-1107<sup>a</sup></i>        | Uncultured <i>cyanobacterium</i> clone LH16_269                 | KM112118.1       | 99   | McMurdo Dry Valley Lakes, Antarctica - benthic mats       | <i>Phormidesmis priestleyi</i> ANT.L66.1            | AY493581.1       | 99   | Antarctic lake - benthic microbial mat           |
| <i>Methylobacterium-1508<sup>b</sup></i>    | Uncultured bacterium clone LIB079_B_C08                         | KM852235.1       | 99   | Biofilm – drinking water                                  | <i>Methylobacterium brachiatum</i> strain ZJ0902B96 | KU173699.1       | 98   | East China sea - surface seawaters               |
| <i>Xenococcaceae-2773<sup>a</sup></i>       | Uncultured <i>cyanobacterium</i> clone FQSS103                  | EF522323.1       | 98   | Rocky Mountain, USA - endolithic sandstone community      | <i>Chroococcus</i> sp. VP2-07                       | GQ504036.1       | 91   | Italy and Spain - fountains                      |
| <i>Streptophyta-3354<sup>b</sup></i>        | Uncultured bacterium clone BJOH-158                             | KP724774.1       | 97   | South Shetland Archipelago, Antarctica - glacier ice      | <i>Bryum argenteum</i> chloroplast                  | KT343960.1       | 95   | Botany Bay, Antarctica - Antarctic moss          |
| <i>Leptolyngbya-5202<sup>a</sup></i>        | Uncultured <i>cyanobacterium</i> clone LH16_269                 | KM112118.1       | 99   | McMurdo Dry Valley Lakes, Antarctica - benthic mats       | <i>Phormidesmis priestleyi</i> ANT.L66.1            | AY493581.1       | 99   | Antarctic lake - benthic microbial mat           |
| <i>Methylobacterium-6342<sup>b,c</sup></i>  | Uncultured <i>alphaproteobacterium</i> clone CN-2_B05           | EF219937.1       | 99   | Antarctica, unvegetated soil environments at Coal Nunatak | <i>Methylobacterium tardum</i> strain IHBB 11162    | KR085941.1       | 99   | Suraj Tal, Trans Himalayas - Lake Water          |
| <i>Rickettsiaceae-7571<sup>b</sup></i>      | <i>Candidatus Trichorickettsia mobilis</i> clone 35             | HG315619.1       | 95   | Wastewater plant                                          | <i>Candidatus Trichorickettsia mobilis</i> clone 35 | HG315619.1       | 95   | Wastewater plant                                 |
| <i>Pseudomonas-37120<sup>b</sup></i>        | <i>Pseudomonas salomonii</i> strain HS9-MRL                     | KX128926.1       | 98   | Siachen Glacier, Pakistan - ice, water and sediment       | <i>Pseudomonas antarctica</i> strain PAMC 27494     | CP015600.1       | 98   | Barton Peninsula, King George Island, Antarctica |
| <i>Sediminibacterium-472311<sup>a</sup></i> | Uncultured <i>Sediminibacterium</i> sp. clone Limnopolar-0.5-B2 | FR848659.1       | 99   | Byers Peninsula, Antarctica - limnopolar lake             | <i>Vibrionimonas magnilacihabitans</i> strain MU-2  | NR_133888.1      | 99   | Lake Michigan - water sample                     |
